# Supplementary material for: A Critical Evaluation and Framework of Business Process Improvement Methods
Source: Springer Nature journal article supplement (doi:10.1007/s12599-015-0417-x), 2015-11-26
Supplement: 12599_2015_417_MOESM1_ESM.pdf [file 12599_2015_417_MOESM1_ESM.pdf]

# **A Critical Evaluation and Framework of Business Process Improvement Methods**

**Rob J. B. Vanwersch, Khurram Shahzad, Irene Vanderfeesten, Kris Vanhaecht, Paul Grefen, Liliane Pintelon, Jan Mendling, Godefridus G. van Merode, Hajo A. Reijers**

Bus Inf Syst Eng 58(1) (2016)

**Appendix (available online via <http://link.springer.com>)**

# Appendix A: Review Protocol

---

## 1. Introduction

This appendix presents the final protocol that supported the execution of the literature review. In this protocol, we discuss the different literature review stages as outlined by Kitchenham (2004): purpose, organization, searching for literature, relevance screening, quality screening, data extraction and coding, and data synthesis and reporting. In the second section, we discuss the purpose of this literature review, which includes the research objectives and related scoping decisions. Subsequently, the project organization of this literature review is briefly described in section three. The fourth section describes the search strategy that was used to identify a relatively complete census of relevant literature. The so-called 'relevance and quality screening' are outlined in section five and six. In section seven, we discuss our data extraction and coding strategy. Finally, we explain our data synthesis and reporting strategy in section eight.

## 2. Purpose

In this section, the research objectives and scoping decisions of this literature review are explained.

### 2.1 Research objectives

This systematic literature review aims at (1) supporting practitioners in composing a method for the generation of process improvement ideas, and (2) providing inspiration for researchers who aim to develop new methods for this act. A methodological framework is presented that contains a comprehensive overview of method options for six key choices to be made with regard to such a method. Next to presenting the framework, this review offers recommendations that further support researchers in developing methods for generating process improvement ideas.

### 2.2 Research scope

In order to achieve the research objective, this systematic review consists of two parts that each applies a similar but separate search and screening procedure. The first part targets studies that either have developed a method for generating process improvement ideas (*method development studies*) or reviewed multiple methods for generating these ideas (*method review studies*). The second part targets studies that have investigated success factors of generating process improvement ideas (*success factor studies*). The scope of each part is outlined below.

#### Scope part 1

With regard to method development and method review studies, four decisions were made concerning the research scope:

- It is limited to methods that aim at redesigning an interdepartmental or inter-organizational order-fulfillment process;
- It is limited to holistic methods;
- It is limited to methods that support practitioners in generating process improvement ideas;
- It is not limited to application domain-independent methods. Methods related to the healthcare domain are also within the scope of this literature review.

The details of the four decisions that were made regarding the scope of the first part are discussed below.

#### *Methods that aim at redesigning an interdepartmental or inter-organizational order-fulfillment process*

The scope is limited to methods that aim at redesigning interdepartmental or inter-organizational order-fulfillment processes. It is widely acknowledged that due to the existence of dependencies between sub-processes from different departments, business process redesign initiatives need an interdepartmental or even a cross-organizational focus to achieve significant process performance gains (e.g. Vos et al. 2009). Hence, we focus on methods that aim at redesigning such a comprehensive order-fulfillment process.

#### *Holistic methods*

The scope is restricted to holistic (multidimensional) methods. In contrast to one-dimensional methods, multidimensional methods do not have a single pre-defined solution concept in mind, but aim at changing multiple elements of a process simultaneously and take into account the effects on different process performance dimensions. It is assumed that, due to these characteristics, holistic methods have the most potential to achieve significant improvements in practice. Reijers and Limam Mansar (2005) have presented a Business Process Redesign (BPR) framework to describe the elements that can be candidates for redesign. These are: customers, products, business process (with an operation and behavioural view), organization (with a structure and population view), information, technology, and the external environment. In addition to changing multiple elements of a process simultaneously, holistic methods also take into account their effects on multiple process performance dimensions. According to Jansen-Vullers et al. (2008), costs, time, flexibility, internal and external quality dimensions can be distinguished. In this literature review, a method is called a *holistic method* if it aims at changing at least three process elements and takes into account the effects of redesigns on at least two process performance dimensions.

#### *Methods that support practitioners in generating process improvement ideas*

A business process redesign initiative broadly covers four phases: 1) framing the process of interest, 2) understanding the current AS-IS process, 3) designing the new TO-BE process, and 4) implementing the new process (Netjes, 2010). The scope is restricted to methods that aim at supporting practitioners in generating process improvement ideas. These methods belong to the third phase of a business process redesign initiative. However, this literature review specifically takes the outputs into consideration that are gained from the framing and understanding of the process in the first two phases since they are clearly relevant as input for the third phase. This literature review neither ignores the outputs of the third phase that are needed as input for the fourth phase. Nevertheless, a detailed analysis of methods that are used in the first, second and fourth phase of a business process redesign initiative is outside the scope of this literature review.

#### *Application domain-independent methods as well as methods related to the healthcare domain*

In the healthcare domain, administrative processes, which have been the target of many traditional BPM initiatives, meet (patient-)logistic processes, which are often characterized by a highly complex and flexible interplay of different specialized organizational units (Mans et al., 2009; Mans et al., 2013). As such, the healthcare domain faces special process integration and redesign challenges, which makes this domain an interesting development ground for process improvement methods. Based on this reasoning, our review targets domain-independent methods as well as methods related to the healthcare domain.

## Scope part 2

With regard to success factor studies, five decisions were made concerning the research scope:

- It is limited to success factors of initiatives that aim at redesigning an interdepartmental or inter-organizational order-fulfillment process;
- It is limited to success factors of initiatives that aim at holistic business process improvement;
- It is limited to success factors of initiatives that aim at generating process improvement ideas;
- It is not limited to application-domain independent success factors. Also, success factors of business process redesign initiatives in healthcare are investigated.
- It is limited to success factors that are actionable.

The first four decisions have been explained in the preceding subsection. In the remainder of this subsection, the last decision is explained.

### *Actionable success factors*

The term action-ability refers to the degree to which the success factor allows a concrete action to be taken or concrete decision to be made (Grunert and Ellegaard, 1992). In this literature review, it refers to the degree to which the success factor allows a concrete methodological choice to be made. In feedback theory, three information levels are distinguished: the meta-task level, the task level and the task learning level (DeNisi and Kluger 2000). At the meta-task level, the highest level, information is not considered to be actionable. For example, the success factor “ensure top management support” does not allow a concrete action to be taken. The next level, i.e. the task level, is related to actual task performance and is actionable. For instance, “Clearly articulate the purpose of the project and its strategic contribution” is an actionable statement at the task level. The task learning level, the lowest level, focuses on the details of task execution and is also actionable. For example, “Give a 5-sheet PowerPoint presentation at 8:00 AM to discuss the purpose of the project and its strategic contribution” is a statement at the task learning level. Although this statement is actionable, our focus is on identifying success factors at the task level.

## 3. Organization

For this literature review, a project organization was established. The project organization consisted of a project coordinator, a review team, and an advisory committee. The *project coordinator* was responsible for the coordination of all activities concerning this literature review. Together with another project member, the project coordinator formed the *review team*. This team was responsible for developing the review protocol, searching and selecting the studies to be included in this literature review, extracting and coding data, and synthesizing and reporting the outcomes of this literature review. During the synthesizing and reporting stage, an additional researcher was added to the review team. The *advisory committee* was responsible for reviewing the protocol, the list of studies selected for data extraction, and the draft research paper. This committee consisted of scientific experts in the field of business process redesign. Because research in this field is conducted by scientists that work in different research domains, two experts for each of the relevant domains were invited to participate in the advisory committee. More specifically, the six members of the advisory committee covered the domains of information systems, management sciences, and health sciences.

## 4. Searching for literature

The aim of the search stage is to identify studies in such a way that a relatively complete census of relevant literature is accumulated (Webster and Watson 2002). As recommended by many studies

(Fink 2010; Kitchenham 2004; Levy and Ellis 2006; Okoli and Schabram 2010; Randolph 2009), multiple search strategies were used in order to establish that important studies did not remain unidentified. We started with an electronic database search in order to enable a comprehensive search (Fink 2010; Okoli and Schabram 2010; Randolph 2009; Rowley and Slack 2004). Subsequently, a secondary search was conducted to identify additional studies by means of backward and forward tracing of references. To further establish that important studies did not remain unidentified, the members of the advisory committee were contacted to assess the completeness of the search at the end of this secondary search. Below, the primary search, secondary search, and advisory committee consultation are explained and corresponding practical concerns are discussed.

#### **4.1 Primary search**

The primary search is an electronic database search that is aimed at identifying an initial set of studies.

##### **Selection of electronic databases**

As proposed by a number of studies (Brereton et al. 2007; Levy and Ellis 2006), multiple electronic databases were used to cover the different research domains that are active in the field of business process redesign. More specifically, the electronic databases INSPEC, ABI/Inform, and Medline were selected to provide coverage of the information systems, management sciences, and health sciences domain respectively. In addition, the EPOC Cochrane database and the International Journal of Care Pathways were scanned manually. These sources are outside the scope of the selected search engines but are considered to be highly relevant.

##### **Selection of data sources**

In line with the recommendations of Rowley and Slack (2004) and Webster and Watson (2002), the primary search was targeted at peer-reviewed journal articles and conference papers in order to efficiently identify high quality studies. This search was further constrained by limiting our attention to studies that contain an abstract and were published in English in or after the year 1990. The year 1990 is considered to be the year of the start of the process wave with publications of Hammer's (1990) and Davenport and Short's (1990) work (Adesola and Baines 2005; Grover et al. 1995).

##### **Search terms electronic databases**

As recommended by Fink (2010) and Grimshaw et al. (2003), a broad search using free text and database specific headings was used to identify an initial set of studies in an effective way. Although all three selected electronic databases have a detailed thesaurus, we concluded that for business process redesign initiatives electronic databases are poorly indexed. On the one hand, many different headings can and, in fact, are used to code business process redesign initiatives. On the other hand, many heterogeneous studies are labelled to the same heading. Our stated findings are in line with Grimshaw et al. (2003). Hence, it was decided to complement high-level headings with a free text search in the title of the study to identify studies in an effective way. The free text search term was based on the research objective and derived from the thesaurus terms of all three electronic databases. More details about the construction of the free text search term are described below.

With regard to the first part, the elements "method", "redesign", and "process" were selected for further investigation. The elements "factor", "redesign", and "process" were selected for further investigation with regard to the second part. A structured scan of the thesaurus trees of all electronic databases was performed to discover related thesaurus terms for all these elements. After obtaining

these terms, cross checks were performed between the different electronic databases<sup>1</sup>. In this way, possible undiscovered thesaurus terms during the initial scan were localized and identified. After obtaining the thesaurus terms, additional synonyms, antonyms, and abbreviations were identified by means of a general thesaurus, acronym library, and trial searches. Finally, advanced search options like Boolean operators and truncation symbols were used to construct the free text search term. We created the following Boolean expression with respect to the first part:

(([process] AND [redesign]) OR [process redesign]) AND [method]

Regarding the second part, the following Boolean expression was created:

(([process] AND [redesign]) OR [process redesign]) AND [factor]

Each part in the above Boolean expression surrounded by the ([ ]) symbol is itself a Boolean expression consisting of synonyms, acronyms, and abbreviations. For each part, the complete Boolean expression is shown in Table A.1.

| Part             | Complete Boolean expression                                                                                                                                                                                                                                                                                                               |
|------------------|-------------------------------------------------------------------------------------------------------------------------------------------------------------------------------------------------------------------------------------------------------------------------------------------------------------------------------------------|
| Process          | business model: OR (care ADJ3 continuit:) OR (care ADJ3 continuum:) OR case management OR chain: OR delivery system: OR network: OR operation: OR order fulfil: OR order processing OR organi#ational model: OR pathway: OR patientflow: OR patient flow OR process OR processes OR product: line: OR service: OR workflow: OR work flow: |
| Redesign         | chang: OR CI OR CQI OR CQM OR design: OR develop: OR engineer: OR improv: OR innovat: OR invent OR inventi: OR optim: OR Quality Management OR redesign: OR reengineer: OR re-engineer: OR reform: OR reorgani: OR restructur: OR streamlin: OR total quality OR TQM                                                                      |
| Process redesign | BPR OR (clinical ADJ2 path:) OR (critical ADJ2 path:) OR disease management OR integrated delivery OR (integrated ADJ2 path:) OR kaizen OR lean OR (patient ADJ2 centered ADJ2 care) OR (patient ADJ2 focused ADJ2 care) OR six sigma                                                                                                     |
| Method           | approach: OR blueprint: OR guide: OR guidebook: OR handbook: OR instruction: OR manual: OR method: OR procedure: OR protocol: OR road map: OR technique: OR tool:                                                                                                                                                                         |
| Factor           | antecedent OR barrier: OR cause: OR challenge: OR determinant: OR enabler: OR factor: OR guideline: OR hurdle: OR issue: OR lesson: OR obstacle: OR recommendation: OR requirement: OR risk: OR rule:                                                                                                                                     |

**Table A.1:** Overview Boolean expressions. The Boolean expressions in this table are used in the INSPEC and Medline database. In the ABI/Inform database slightly different truncation symbols are used.

As explained earlier, the free text search in the title of the studies was complemented with the use of database specific headings. Specifically, we complemented the free text search with the use of high-level subject headings and classification codes in INSPEC and Mesh headings and sub-headings in Medline. Headings were not used in ABI/Inform due to the absence of a clear hierarchical tree structure of headings. Regarding the other electronic databases, the selection of headings was on the safe side of inclusiveness. The detailed search filters of the three electronic databases, including the selected headings, are shown in Attachment 1.

## 4.2 Secondary search

After identification of an initial set of potentially relevant studies by means of performing the primary search, the relevance and quality of each identified study was screened. The relevance and quality screening procedures are discussed in detail in section five and six. After these screening procedures, a secondary search was performed based on the articles that passed the relevance and

<sup>1</sup> For each thesaurus term identified within one of the electronic databases, we checked whether this term was also identified within the other electronic databases or not. If it was not identified in a certain database, the term was entered in the thesaurus of the electronic database. In case the term was found in the thesaurus of that database, additional terms were identified by scanning relevant broader, narrower, and related terms in the thesaurus of that database. In this way, possible undiscovered trees / terms during the initial scan were localized by the cross check procedure.

quality screen. More specifically, the backward and forward tracing techniques were used to identify additional relevant studies (for forward tracing of references, Google scholar was used). The full copies of the identified papers by means of this secondary search were screened similar to the full copy screening procedures as discussed in section five and six. As recommended by Webster and Watson (2002), the secondary search stopped when new relevant concepts were no longer discovered.

#### **Data sources**

The secondary search was targeted at peer-reviewed journal articles, conference papers, technical reports, and book chapters. Analogously to the primary search, this search was further constrained by limiting our attention to studies that were published in English.

#### **4.3 Advisory committee consultation**

After the execution of the secondary search, the members of the advisory committee were contacted to assess the completeness of the search and recommend additional literature. The full copies of the identified papers by means of this consultation were screened similar to the full copy screening procedures as discussed in section five and six.

#### **4.4 Practical concerns**

In order to manage the large number of references, a bibliographic package was used. The generated unfiltered search results were saved and retained for further analysis.

### **5. Relevance screening**

During the relevance screening stage, the studies that are considered relevant and the ones that are considered irrelevant were determined. As suggested by a number of studies (Fink 2010; Okoli and Schabram 2010; Randolph 2009; Torracco 2005), inclusion and exclusion criteria were defined and a screening procedure was developed to select studies in an unbiased way. In the remainder of this section, the inclusion and exclusion criteria, screening procedure, and corresponding practical concerns are discussed.

#### **5.1 Inclusion and exclusion criteria**

As recommended by Kitchenham (2004), the formulation of the inclusion and exclusion criteria was inspired by the research objectives and related scoping decisions. Regarding the first part, the inclusion and exclusion criteria are shown in Table A.2. All criteria were formulated as questions where the answers to these questions determine whether the study was included or not. A study only passed the relevance screen if all criteria in Table A.2 were fulfilled. More precisely, for each study, all the questions corresponding to the inclusion criteria had to be answered with either “Yes” or “?” and all the questions corresponding to the exclusion criteria had to be answered with “No” or “?”. With regard to *method review studies*, at least one of the reviewed methods should pass the criteria a-d in order to be included.

**Inclusion (I) and exclusion (E) criteria**

1. Does the study aim at developing a business process redesign method or reviewing multiple business process redesign methods? *(I)*
  - a. Does the method aim at redesigning inter-departmental or inter-organizational order-fulfillment processes? *(I)*
  - b. Is the method a holistic method? *(I)*
    - i. Does the method aim at changing at least three different process elements? *(I)*
    - ii. Does the method take into account the effects of redesigns on at least two different process performance dimensions? *(I)*
  - c. Does the method support practitioners in generating process improvement ideas? *(I)*
    - i. Does the method only aim at framing the process of interest? *(E)*
    - ii. Does the method only aim at modelling or analyzing the AS-IS situation? *(E)*
    - iii. Does the method only aim at evaluating different process alternatives? *(E)*
    - iv. Does the method only aim at implementing a new process improvement idea? *(E)*
  - d. Is the method customized for another domain than the healthcare domain? *(E)*

**Table A.2:** Overview relevance criteria related to the first part.

The inclusion and exclusion criteria related to second part are shown in Table A.3. A study only passed the relevance screen if all criteria in Table A.3 were fulfilled.

**Inclusion (I) and exclusion (E) criteria**

1. Does the study aim at identifying success factors of business process redesign initiatives? *(I)*
  - a. Does the study focus on initiatives that aim at redesigning inter-departmental or inter-organizational order-fulfillment processes? *(I)*
  - b. Does the study focus on initiatives that aim at holistic business process improvement? *(I)*
    - i. Do the initiatives aim at changing at least three different process elements? *(I)*
    - ii. Do the initiatives take into account the effects of redesigns on at least two different process performance dimensions? *(I)*
  - c. Does the study focus on initiatives that aim at supporting practitioners in generating process improvement ideas? *(I)*
    - i. Do the initiatives only aim at framing the process of interest? *(E)*
    - ii. Do the initiatives only aim at modelling or analyzing the AS-IS situation? *(E)*
    - iii. Do the initiatives only aim at evaluating different process alternatives? *(E)*
    - iv. Do the initiatives only aim at implementing a new process improvement idea? *(E)*
  - d. Are the success factors actionable and formulated at the task level? *(I)*
  - e. Does the study aim at identifying success factors that are specific for another domain than the healthcare domain? *(E)*

**Table A.3:** Overview relevance criteria related to the second part.**5.2 Screening procedure**

As proposed by a number of studies (Brereton et al. 2007; Kitchenham 2004), a two-stage screening procedure was used to select relevant studies in an efficient way:

- The title and abstract of studies identified by the primary search were screened by a single reviewer and irrelevant studies were excluded from further examination. This screen was on the safe side of inclusiveness and based on the inclusion and exclusion criteria as discussed earlier. For each study, the criteria were judged from top to bottom. If one of the relevance screen criteria was not met, no further analysis of other criteria was performed. A subset of titles and abstracts was screened by a second reviewer in order to test inter-rater-agreement. Analogously to Mistiaen et al. (2007), inter-rater-agreement was assessed on a 10% random sample of studies. Fink (2010) has recommended the use of the Kappa statistic to evaluate inter-rater-agreement. If the Kappa statistic was lower than the generally accepted threshold, i.e. 0.6, then the complete set of studies was reviewed by two reviewers. Any inclusion / exclusion disagreements between the reviewers were resolved by consensus.
- Full copies were obtained for all studies that passed the title and abstract screen. All full copies were independently reviewed against the inclusion and exclusion criteria by two reviewers. For each study, the criteria were judged from top to bottom. If one of the relevance screen criteria was not met, no further analysis of other criteria was performed. Inter-rater-agreement was again



evaluated by means of the Kappa statistic and any disagreements between the reviewers were resolved by means of consensus approach.

Before the start of the screening procedure, all criteria and screening activities were piloted, discussed, and documented in detail by the members of the review team. During the execution of the relevance screening procedure, screening issues, and improvement possibilities were discussed in review meetings without referring to individual studies.

### 5.3 Practical concerns

A spreadsheet was used to document all inclusion and exclusion decisions in detail. All search results that had been stored in the bibliographic package were exported to this spreadsheet. A flowchart was created to summarize the relevance screening results.

## 6. Quality screening

After screening for relevant studies, it is necessary to assess the quality of primary studies (Fink 2010; Grimshaw et al. 2003; Kitchenham 2004; Levy and Ellis 2006; Okoli and Schabram 2010). Similar to the previous stage, inclusion and exclusion criteria were defined and screening procedures were developed for an unbiased selection of studies. The final inclusion and exclusion criteria were determined after the relevance screen. In the remainder of this section, the inclusion and exclusion criteria, screening procedure, and corresponding practical concerns are discussed.

### 6.1 Inclusion and exclusion criteria

Inclusion and exclusion criteria were defined on the safe side of inclusiveness, because further validation of the methodological framework will take place by means of a cross-case survey and a field study among consultancy firms. Analogously to the relevance screen, all criteria in Table A.4 or Table A.5 had to be fulfilled to pass the quality screen. The inclusion and exclusion criteria related to the first part are shown in Table A.4.

| Inclusion (I) and exclusion (E) criteria |                                                                                                                                     |
|------------------------------------------|-------------------------------------------------------------------------------------------------------------------------------------|
| 1.                                       | Is a clear statement of the research objective and scope available? (I)                                                             |
| 2.                                       | Is the activity of generating process improvement ideas explained? (I)                                                              |
| 3.                                       | Does a literature review or field study form the basis for the development / review of the business process redesign method(s)? (I) |

**Table A.4:** Overview quality criteria related to the first part.

With regard to the second part, the inclusion and exclusion criteria are shown in Table A.5.

| Inclusion (I) and exclusion (E) criteria |                                                                         |
|------------------------------------------|-------------------------------------------------------------------------|
| 1.                                       | Is a clear statement of the research objective and scope available? (I) |
| 2.                                       | Is a clear description of the research methodology available? (I)       |
| 3.                                       | Are clear descriptions of success factors available? (I)                |

**Table A.5:** Overview quality criteria related to the second part.

## **6.2 Screening procedure**

The quality screening was independently executed by two reviewers for all studies that had passed the relevance screen. Full copies of these studies were reviewed based on the inclusion and exclusion criteria of the quality screen. For each study, the criteria were judged from top to bottom. If one of the quality screen criteria was not met, no further analysis of other criteria was performed. In line with the relevance screen, inter-rater-agreement was assessed by means of the Kappa statistic and any disagreements between the two reviewers were resolved by consensus. Similar to the relevance screen, all criteria and screening activities were piloted, discussed, and documented in detail by the members of the review team, before the execution of the screen. During the execution of the quality screening procedure, review meetings were again scheduled to discuss screening issues and improvement possibilities without referring to individual studies.

## **6.3 Practical concerns**

The spreadsheet that had been used to document the results of the relevance screen was also used to document all inclusion and exclusion decisions of the quality screen. A flowchart was again created to summarize the quality screening results.

## **7. Data extraction and coding**

After identification of the studies that had to be included in the literature review, useful data from each included study was extracted and coded. For an unbiased data extraction and coding, a number of studies (Brereton et al. 2007; Kitchenham 2004; Okoli and Schabram 2010; Randolph 2009) recommend the development of a data extraction form and an accompanying data extraction and coding procedure. In the remainder of this section, the data extraction form, the data extraction and coding procedure, and corresponding practical concerns are discussed.

### **7.1 Data extraction form**

As proposed by Okoli and Schabram (2010), the detailed data extraction form was developed after the quality screening procedure had been applied in order to make use of the insights gained during the preceding stages. We decided to extract two types of data elements from the studies. Firstly, we extracted data from the studies with regard to several methodological decision areas, i.e. method elements, in order to build the methodological framework. Secondly, several study characteristics, i.e. context elements, were extracted in order to gain insights into the context of method development and offer recommendations with regard to the development of further methodological support.

#### **Method elements**

Several researchers in the field of Method Engineering, i.e. the engineering discipline to design, construct and adapt methods, techniques and tools for systems development, have developed meta-modeling techniques for representing methods (Brinkkemper 1996; Henderson-Sellers and Ralyté 2010). A comparison of these meta-models (Cossentino et al. 2006) reveals that there are four main method elements. These method elements are: Activity (what is to be done?), Guidance (how to do it?), Actor (who does it? and who is responsible for it?), and Artifact (what is the result? and what is input for it?).

These method elements resemble the elements that were used to represent methods by researchers in the context of business process (re)design projects (Alt et al. 2001; Zellner 2011): Procedure model

(what has to be done in which order?), Technique (how to do it?), Role (who does it?), Results document (what is the result?), and Meta-model / information model (consist of the above-described elements and their relationships).

As a method can be seen as a special type of process, the method elements presented above are also closely related to the elements of the Business Process Redesign Framework proposed by Reijers and Limam Mansar (2005). Based on an analysis of this framework, we have concluded that a “tool (with what to do it?)” element is still missing in current method meta-models. In line with Kettinger et al. (1997), a technique defines how a standard activity is executed and a tool is a computer software package that is able to support one or more techniques.

Additionally, we extended the set of elements by adding an “aim (why to do it?)” element, in order to gain, among others, insights into the process performance dimensions that the method aims to change. Because we limited ourselves to a single activity in this literature review, i.e. generating process improvement ideas, an extraction of the procedure model / activity became superfluous. As a result, the meta-model on which our data extraction form was based, contained the following method elements:

- Aim (why to do it?)
- Actors (who do it? and who are responsible for it?)
- Input (what is input for it?)
- Output (what is the result?)
- Technique (how to do it?)
- Tool (with what to do it?)

### **Context elements**

Besides method elements, we decided to extract several characteristics of the studies in order to gain insights into the context of method development. Similar to Walia and Carver (2009), who developed a taxonomy/framework for software requirements errors in a highly structured way, we decided to extract the following context elements from all studies: Identifier, Title, Authors, Publication year, Source, Type of source, Type of study, Label research area, Definition research area, Covered industries, Study objective, Study design, Data collection techniques, Data analysis techniques, Main findings, and Main limitations.

### **Complete data extraction form**

The complete data extraction form including definitions is shown in Table A.6. In the third and fourth column, the “tag names” and “open and axial coding” attributes are introduced that were used during data coding. The detailed data extraction and coding procedure and these attributes are explained in the next subsections.

## **7.2 Data extraction and coding procedure**

In line with the grounded theory approach as recommended by Wolfswinkel et al. (2013), all data fragments were extracted and coded in an iterative fashion by making use of a structured procedure. The first author of this paper extracted data from all studies and a tag name was assigned to each extracted data fragment (e.g. “Method.Actor”). For the data elements that were selected for the open and axial coding step, a more detailed code was also assigned to each extracted data fragment, using terms taken directly from the articles when available (e.g. “Actor.External consultant”). The second author of this paper independently extracted and coded data for a 10% random sample of studies. Subsequently, data extraction and coding discrepancies were discussed in detail by both reviewers

and resolved by consensus. In line with recommendations from Brereton et al. (2007), an extractor-checker construction was used to extract and code data from the remaining studies in an efficient way. The consensus approach was again used to resolve data extraction and coding discrepancies. During the execution of the data extraction and coding procedure, review meetings were scheduled to discuss data extraction and coding issues and improvement possibilities.

After this data extraction and initial coding step, the data elements that were assigned a more detailed code were analyzed in more detail by both reviewers. More specifically, as recommended by Wolfswinkel et al. (2013) an axial coding step was executed by both reviewers that resulted in updated concepts and categories.

| <i>Method element</i>          |                                                                                                                 |                   |                              |
|--------------------------------|-----------------------------------------------------------------------------------------------------------------|-------------------|------------------------------|
| <b>Data extraction element</b> | <b>Definition</b>                                                                                               | <b>Tag name</b>   | <b>Open and axial coding</b> |
| 1. Aim                         | The objective of the method activity                                                                            | Method.Aim        | Yes                          |
| 2. Actors                      | The role who executes the method activity                                                                       | Method.Actors     | Yes                          |
| 3. Input                       | The information that is collected prior to the method activity                                                  | Method.Input      | Yes                          |
| 4. Output                      | The artifacts that are the results of the method activity                                                       | Method.Output     | Yes                          |
| 5. Technique                   | Prescription of how to execute the method activity                                                              | Method.Technique  | Yes                          |
| 6. Tool                        | A software package that is able to support the method activity                                                  | Method.Tool       | Yes                          |
| <i>Context element</i>         |                                                                                                                 |                   |                              |
| <b>Data extraction element</b> | <b>Definition</b>                                                                                               | <b>Tag name</b>   | <b>Open and axial coding</b> |
| 1. Identifier                  | Unique identifier of the study                                                                                  | -                 | No                           |
| 2. Title                       | Title of the study                                                                                              | -                 | No                           |
| 3. Authors                     | Authors of the study                                                                                            | -                 | No                           |
| 4. Publication year            | Publication year of the study                                                                                   | -                 | No                           |
| 5. Source                      | Source name of the study                                                                                        | -                 | No                           |
| 6. Type of source              | Type of source (Journal paper / Conference paper / Book chapter / Technical report) of the study                | -                 | No                           |
| 7. Type of study               | Type of study (Method development study / Method review study / Success factor study)                           | -                 | No                           |
| 8. Label research area         | The business process redesign related label that is used in the study (e.g. clinical pathways, lean, six sigma) | -                 | No                           |
| 9. Definition research area    | The definition of the research area                                                                             | Study.Definition  | No                           |
| 10. Covered industries         | The industries that are covered by the study (e.g. healthcare, hospitality, manufacturing)                      | Study.Industries  | No                           |
| 11. Study objective            | The general objective of the study                                                                              | Study.Objective   | No                           |
| 12. Study design               | The research of the design (e.g. literature review, lab experiment, field study)                                | Study.Design      | Yes                          |
| 13. Data collection techniques | The way data is collected (e.g. interviews, questionnaires, observations, document analysis)                    | Study.Collection  | Yes                          |
| 14. Data analysis techniques   | The way data is analyzed (e.g. structured equation modeling)                                                    | Study.Analysis    | Yes                          |
| 15. Main findings              | The main findings of the study                                                                                  | Study.Findings    | No                           |
| 16. Main limitations           | The main limitations of the study                                                                               | Study.Limitations | No                           |

**Table A.6:** Data extraction form.

### 7.3 Practical concerns

The PDF management and annotation tool Qiqqa was used to extract data from the studies and to assign codings. The context elements 1-8 were semi-automatically entered for each study in the standard or user defined fields in Qiqqa. For each study, all fragments within the PDF file that were related to one of the other data elements were annotated and tagged with the tag names as outlined in Table A.6 (e.g. "Method.Actor", "Study.Definition"). For the data elements that were selected for the open and axial coding step, each fragment was additionally coded with a more detailed description. These codings were accompanied by the element name (e.g. "Actor.External consultant"; "Input.Clinical guideline") in order to facilitate the creation of relevant annotation reports in Qiqqa.

For the axial coding step, all Qiqqa codings were exported to a spreadsheet. After the axial coding step, codings were updated and Qiqqa annotations were re-coded. Finally, all Qiqqa codings were exported to a spreadsheet for further statistical analysis.

## 8. Data synthesis and reporting

In the data synthesis and reporting stage, the extracted and coded data were summarized and compared critically. For that, a qualitative synthesis procedure was used that aimed at:

- Putting the knowledge from the review into conceptual framework that offers a new perspective on the topic (Torraco 2005);
- Including a critical evaluation of how well the literature presents the issue: strengths, key contributions as well as deficiencies, omissions, and inaccuracies are identified (Torraco 2005).

As recommended by Randolph (2009) and Webster and Watson (2002), the experts in the advisory committee contributed to the critical evaluation and reviewed the draft research paper.

## References

- Adesola S, Baines T (2005) Developing and evaluating a methodology for business process improvement. *Bus Process Manag J* 11(1):37-46
- Alt R, Reichmayr C, Puschmann T, Leser F, Österle H (2001) An engineering approach to develop business networks. In: Schmid B, Stanoevska-Slabeva K, Tschammer V (eds) *I3E'01: Towards the e-society: e-commerce, e-business, and e-government*. 1st IFIP Conference on E-Commerce, E-Business, E-Government. Kluwer, Deventer, p 209
- Brereton P, Kitchenham BA, Budgen D, Turner M, Khalil M (2007) Lessons from applying the systematic literature review process within the software engineering domain. *J Syst Softw* 80:571-583
- Brinkkemper S (1996) Method engineering: engineering of information systems development methods and tools. *Inf Softw Technol* 38:275-280
- Cossentino M, Gaglio S, Henderson-Sellers B, Seidita V (2006) A metamodelling-based approach for method fragment comparison. In: *EMMSAD'06. Proceedings of the 11th International Workshop on Exploring Modeling Methods in Systems Analysis and Design*, Luxembourg-Kirchberg, Luxembourg
- Davenport TH, Short JE (1990) The new industrial engineering: information technology and business process redesign. *Sloan Manag Rev* 31(4):11-27

- DeNisi AS, Kluger AN (2000) Feedback effectiveness: can 360-degree appraisals be improved? *Acad Manag Executive* 14(1):129-139
- Fink A (2010) *Conducting research literature reviews: from the internet to paper*, 3rd edn. Sage, London
- Grimshaw J, McAuley LM, Bero LA, Grilli R, Oxman AD, Ramsay C, Vale L, Zwarenstein M (2003) Systematic reviews of the effectiveness of quality improvement strategies and programmes. *Qual Saf Health Care* 12:298-303
- Grover V, Jeong SR, Kettinger WJ, Teng JTC (1995) The implementation of business process reengineering. *J Manag Inf Syst* 12(1):109-144
- Grunert KG, Ellegaard C (1992) The concept of key success factors: theory and method. MAPP working paper No. 4. Project No. 15. Aarhus University, Aarhus
- Hammer M (1990) Reengineering work: don't automate, obliterate. *Harv Bus Rev* 68(4):104-112
- Henderson-Sellers B, Ralyté J (2010) Situational method engineering: state-of-the-art review. *J Univers Comput Sci* 16(3):424-478
- Jansen-Vullers MH, Reijers HA (2005) Business process redesign in healthcare: towards a structured approach. *Infor* 43(4):321-339
- Kettinger WJ, Teng JTC, Guha S (1997) Business process change: a study of methodologies, techniques, and tools. *MIS Q* 21(1):55-80
- Kitchenham B (2004) Procedures for performing systematic reviews. Joint Technical Report. Department of Computer Science, Keele University (TR/SE-0401) and National ICT Australia Ltd. (0400011T.1)
- Levy Y, Ellis TJ (2006) A systems approach to conduct an effective literature review in support of information systems research. *Informing Sci* J9:181-212
- Mans RS, Schonenberg MH, Song M, van der Aalst WMP, Bakker PJM (2009) Application of process mining in healthcare - a case study in a Dutch hospital. In: Fred A, Filipe J, B, Stanoevska-Slabeva K, Tschammer V (eds) *BIOSTEC 2008. International Joint Conference on Biomedical Engineering Systems and Technologies*. Springer, Heidelberg, p 425
- Mans RS, van der Aalst WMP, Vanwersch RJB, Moleman AJ (2013) Process mining in healthcare: Data challenges when answering frequently posed questions. In: Lenz R, Miksch S, Peleg M (eds) *ProHealth 2012 / KR4HC 2012: process support and knowledge representation in health care*. *BPM 2012 Joint Workshop. Lecture Notes in Computer Science*, vol 7738. Springer, Heidelberg, p 140
- Mistiaen P, Francke AL, Poot E (2007) Interventions aimed at reducing problems in adult patients discharged from hospital to home: a systematic meta-review. *BMC Health Serv Res* 7:47-65
- Netjes M (2010) *Process Improvement: the creation and evaluation of process alternatives*. Eindhoven University of Technology, Eindhoven
- Okoli C, Schabram K (2010) A guide to conducting a systematic literature review of information systems research. *Sprouts: Working Papers on Information Systems* 10(26):1-49

Randolph JJ (2009) A guide to writing the dissertation literature review. *Pract Assess, Res Eval* 14(13):1-13

Reijers HA, Limam Mansar S (2005) Best practices in business process redesign: an overview and qualitative evaluation of successful redesign heuristics. *Omega* 33:283-306

Rowley J, Slack F (2004) Conducting a literature review. *Manag Res News* 27(6):31-39

Torraco RJ (2005) Writing integrative literature reviews: guidelines and examples. *Hum Resour Dev Rev* 4(3):356-367

Vos L, Van Oostenbrugge RJ, Limburg M, Van Merode GG, Groothuis S (2009) How to implement process-oriented care: a case study on the implementation of process-oriented in-hospital stroke care. *Accred Qual Assur* 14:5-13.

Walia GS, Carver JC (2009) A systematic literature review to identify and classify software requirement errors. *Inf Softw Technol* 51:1087-1109

Webster J, Watson RT (2002) Analyzing the past to prepare for the future: writing a literature review. *MIS Q* 26(2):13-23

Wolfswinkel JF, Furtmueller E, Wilderom CPM (2013) Using grounded theory as a method for rigorously reviewing literature. *Europ J Inf Syst* 22(1):45-55

Zellner G (2011) A structured evaluation of business process improvement approaches. *Bus Process Manag J* 17(2):203-237

## Attachment 1

Date electronic searches: 27/07/2011; date advisory committee consultation: 27/03/2012.

### ABI/Inform:

*Filter settings advanced search:*

- Database: ABI/INFORM GLOBAL
- Data range: after this data: 01/01/1990
- Limit results to: Scholarly journal, including peer-reviewed
- Exclude: Book reviews; Dissertations; Newspapers

### INSPEC:

*Filter settings multi-field search:*

- English language
- Abstract
- Publication year: 1990 - Current
- Publication types: Conference paper; Conference Proceedings; Journal paper
- Subject headings:
  - Systems analysis (not exploded)
    - Systems re-engineering
  - Business process re-engineering
  - Customer services
  - Management of change
  - Organizational aspects (not exploded)
  - Production management (not exploded)
    - Process planning
    - Logistics
  - Quality management (not exploded)
    - Total quality management
    - Continuous improvement
    - Six sigma (quality)
    - Innovation management
  - Supply chain management (not exploded)
  - Administrative data processing
  - Operations research (not exploded)
  - Order processing
  - Management science (not exploded)
  - Health care
  - Patient care
  - Systems engineering
  - Production engineering
  - Industrial engineering
  - Value engineering
  - Process design
  - Optimal systems
  - Constraint theory
  - Constraint handling
  - Lean production
  - Benchmark testing



- Classification codes:
  - Systems theory applications in economics and business
  - Systems theory applications in industry
  - Business and administration (not exploded)
    - Office automation
    - Public administration
    - Medical administration
    - Manufacturing and industrial administration
    - Administration of other service industries
  - Business and professional IT applications
  - Health care applications of IT
  - Industrial and manufacturing applications of IT
  - General topics in manufacturing and production engineering (not exploded):
    - Management and business
    - Organizational aspects
    - Management issues
    - Information technology applications (not exploded)
      - Industrial applications of IT
      - Business applications of IT
  - Production management
  - Research and development
  - Design
  - Manufacturing systems
  - System theory applications

**Medline:**

*Filter settings multi-field search:*

- English language
- Abstract
- Publication year: 1990 - Current
- Mesh headings:
  - *Information sciences / Information science / Systems analysis*
  - *Health care / Health care facilities, manpower and services / Capacity building*
  - *Health care / Health care facilities, manpower and services / Health facilities*
  - *Health care / Health care facilities, manpower and services / Health services*
  - *Health care / Health care economics and organizations / Health planning*
  - *Health care / Health service administration / Organization and administration*
  - *Health care / Health service administration / Patient care management*
  - *Health care / Health service administration / Quality of care*
  - *Health care / Health care quality, access and evaluation / Delivery of health care*
  - *Health care / Health care quality, access and evaluation / Health services research*
  - *Health care / Health care quality, access and evaluation / Health care quality assurance*
  - *Health care / Health care quality, access and evaluation / Quality of health care*
- Sub-headings
  - ec (economics);
  - og (organization & administration);
  - st (standards);
  - sd (supply and distribution);
  - ut (utilization)

# Appendix B: Search and Selection Results

---

## 1. Introduction

This appendix presents the search and selection results of the literature review. The first part targets studies that either have developed a method for generating process improvement ideas (*method development studies*) or reviewed multiple methods for generating these ideas (*method review studies*). The second part targets studies that have investigated success factors of generating process improvement ideas (*success factor studies*). For each part, we applied a similar but separate search and screening procedure. In the next section, we present the search and selection results for both parts.

## 2. Results search and screening activities

In this section, multiple flowcharts are presented that show the results of our searching and screening activities. The numbers in the first row of these figures represent the number of search hits (per electronic database). The numbers in the other rows represent the number of studies that passed the different screening activities. Next to the label of each relevance and quality screening activity, the observed agreement (O) and Kappa statistic (K) are presented. The observed agreement is the percentage of papers for which the same inclusion / exclusion decision was made by the two reviewers. The Kappa statistic is a commonly used statistic for measuring agreement between two reviewers. This statistic is defined as the agreement beyond chance divided by the amount of agreement possible beyond chance (Fink 2010). According to Fink (2010), the following qualitative terms need to be attached to the Kappa statistic in the context of a literature review: 0.0-0.2 = slight, 0.2-0.4 = fair, 0.4-0.6 = moderate, 0.6-0.8 = substantial and 0.8-1.0 = almost perfect. Fink (2010) suggests aiming for Kappa statistics of 0.6 and higher. As shown in all figures below, we fulfill this requirement.

In the remainder of this section, we start with discussing the results of the primary search. Subsequently, we discuss the results that were obtained by means of backward and forward tracing of references, i.e. the results of the secondary search. Finally, the results that were obtained by consulting the advisory committee members are explained.

### Primary search

The primary search of each part contained an electronic database search. More specifically, the databases INSPEC, ABI/Inform and Medline were selected to provide coverage of the information systems, management sciences, and health sciences domain respectively. In addition, the primary search of each part contained a manual scan of two relevant sources outside the scope of these search engines, i.e. the EPOC Cochrane database and the International Journal of Care Pathways. After this primary search, we used a two-stage relevance screening and a quality screening procedure to select relevant and high quality studies for each part. Regarding the first part, the results of the primary search and related screening activities are shown in Figure B.1. With respect to the second part, these results are shown in Figure B.2.

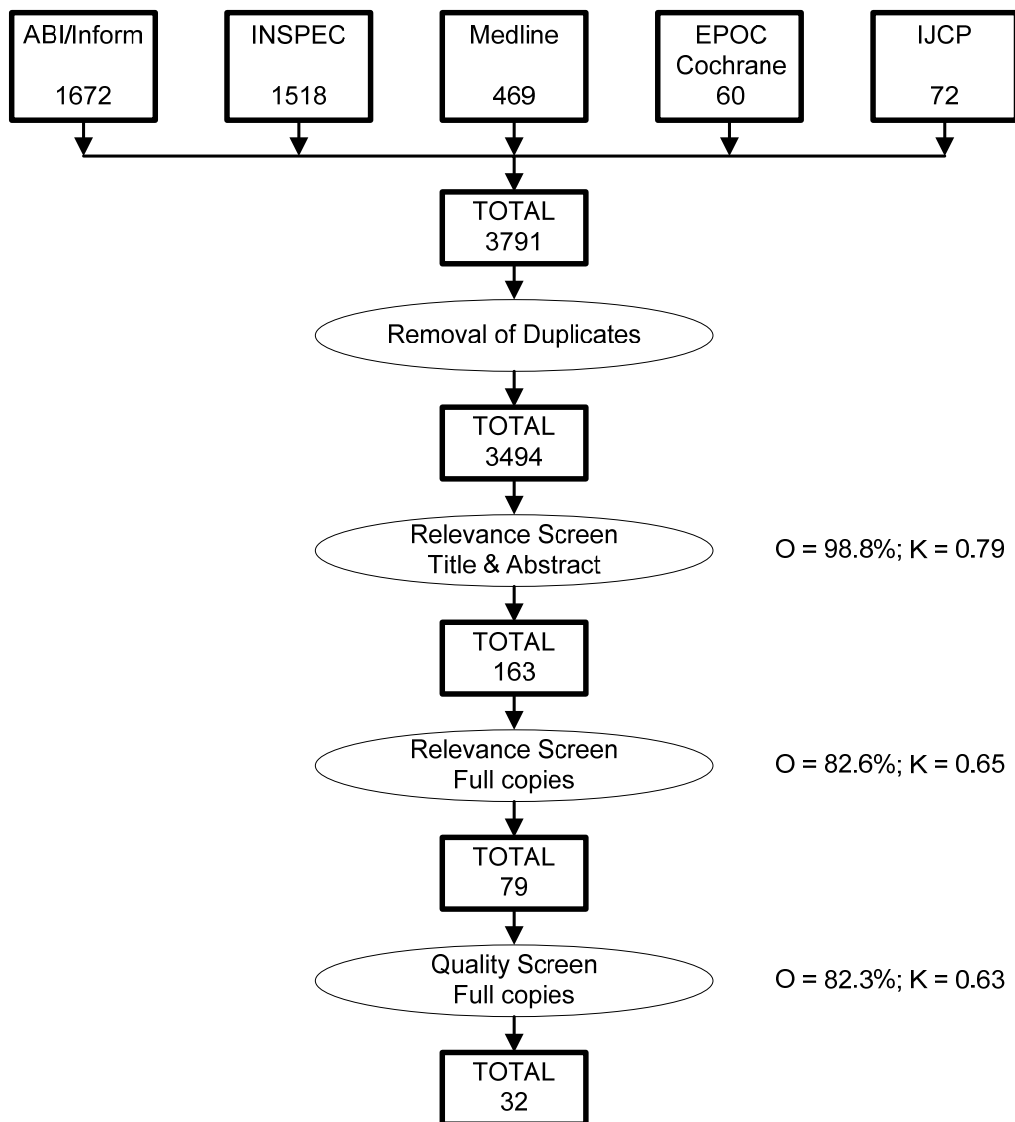

**Figure B.1:** Primary search results part 1. We were not able to obtain seven full copies of studies that passed the “Relevance Screen Title & Abstract”, although we tried to obtain these at seven European universities (Eindhoven, Maastricht, Delft, Rotterdam, Leuven, Berlin and Stockholm) and tried to contact the authors of these articles directly.

The results in Figure B.1 show that the electronic database search retrieved 3791 matching articles with regard to the first part. 32 articles out of these 3791 passed all screening activities. Inter-rater-agreement, as determined by the Kappa statistic, was substantial (0.63 - 0.79) for all screening activities.

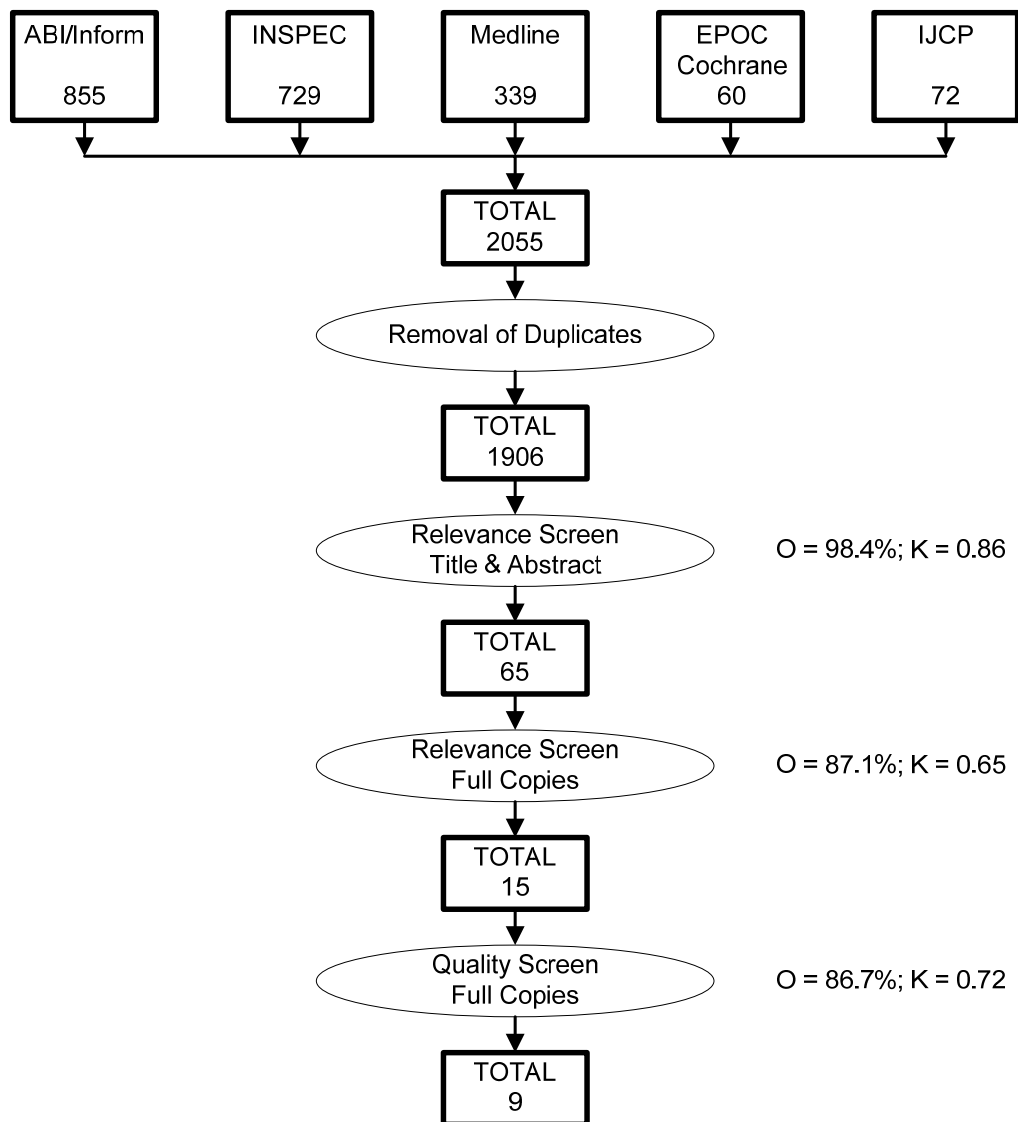

**Figure B.2:** Primary search results part 2. We were not able to obtain three full copies of studies that passed the “Relevance Screen Title & Abstract”, although we tried to obtain these at all universities mentioned earlier and tried to contact the authors of these articles directly.

Figure B.2 shows that the electronic database search retrieved 2055 matching articles regarding the second part. Nine out of these 2055 articles passed all screening activities. Inter-rater-agreement, as determined by the Kappa statistic, varied from substantial (0.63 and 0.72) till almost perfect (0.86) agreement for all screening activities.

### Secondary search

After the execution of the primary search and related screening activities, a secondary search and related screening activities were performed for each part. The secondary search and screening procedure took the final set of selected studies of the primary phase as a basis. By making use of backward and forward tracing (BFT) of references, additional relevant, high quality studies were identified. For the forward tracing of references, Google Scholar was used. After the identification of additional articles, the full copies were obtained and reviewed. This full copy screening was similar to the full copy screening of the primary search. From the second round onwards, the final set of selected studies during the previous round was used as a basis for the backward and forward tracing activities. Tracing activities were stopped when no new concepts were discovered. For the first part, three rounds of backward and forward tracing were performed. The third round did not reveal any new

concepts. The results of the first and second round are shown in Figure B.3 and Figure B.4 respectively. For the second part, backward and forward tracing stopped after two rounds. The results of the first round are shown in Figure B.5.

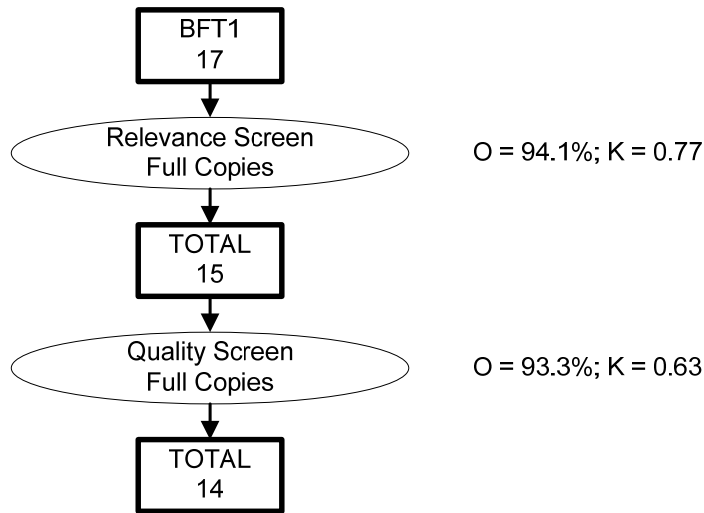

Figure B.3: Secondary search results part 1 round 1.

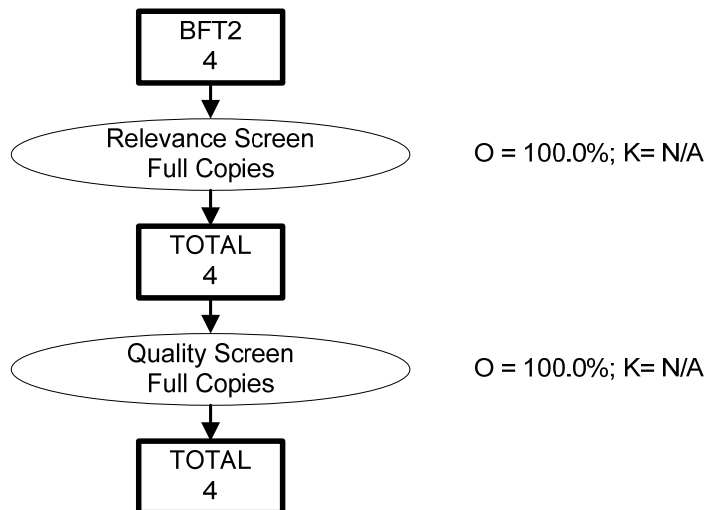

Figure B.4: Secondary results part 1 round 2.

With regard to the first part, the results in Figure B.3 and B.4 show that 21 studies (17 + 4) were identified by means of backward and forward tracing of references. 18 out of these 21 studies (14 + 4) passed the related screening activities and were selected for further examination. Inter-rater-agreement, as determined by the Kappa statistic, varied from substantial (0.63 and 0.77) till perfect (N/A) agreement for all screening activities.

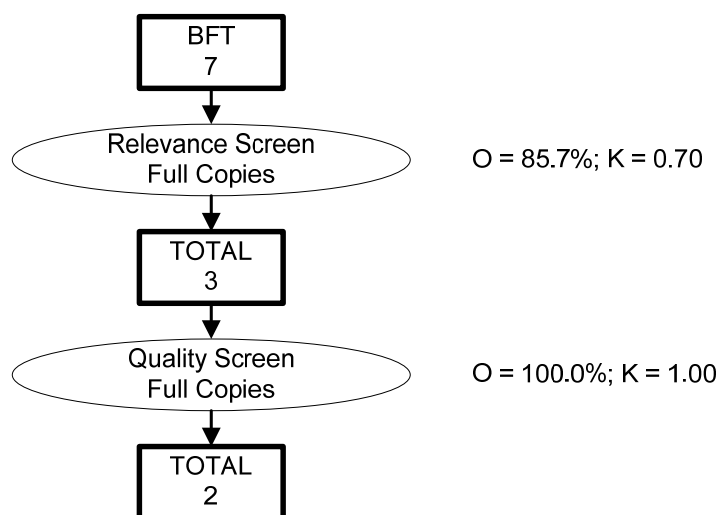

**Figure B.5:** Secondary search results part 2 round 1.

With respect to the second part, Figure B.5 shows that seven studies were identified by means of backward and forward tracing of references. Two out of these seven studies passed the related screening activities and were selected for further examination. Inter-rater-agreement, as determined by the Kappa statistic, varied from substantial (0.70) till perfect (1.00) agreement for all screening activities.

#### **Advisory committee consultation**

To further establish that important studies did not remain unidentified, the members of the advisory committee were invited to assess the completeness of the primary and secondary search and to recommend additional literature. For each part, all articles that were obtained from the advisory committee members were screened similar to the full copy screening procedure described earlier. In Figure B.6, the results of this activity are shown with regard to the first part. Regarding the second part, these results are shown in Figure B.7.

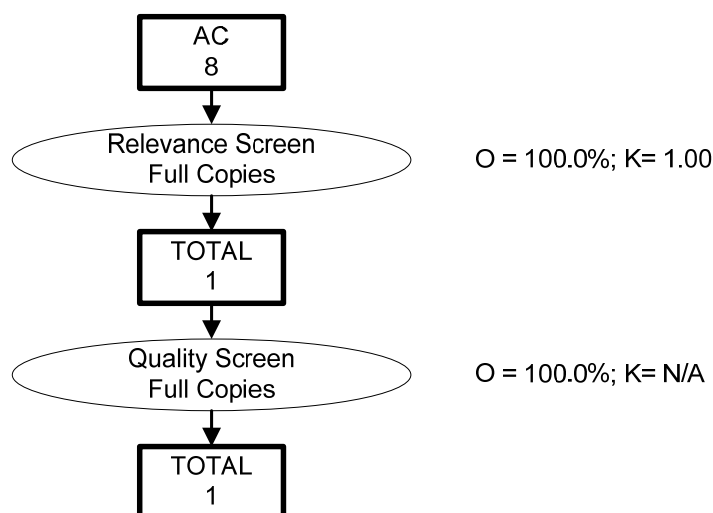

**Figure B.6:** Advisory committee consult results part 1.

Figure B.6 shows that eight studies were suggested by our advisory committee. One out of these eight studies passed the related screening activities and was selected for further examination

regarding the first part. Inter-rater-agreement, as determined by the Kappa statistic, was perfect (1.00 and N/A) for all screening activities.

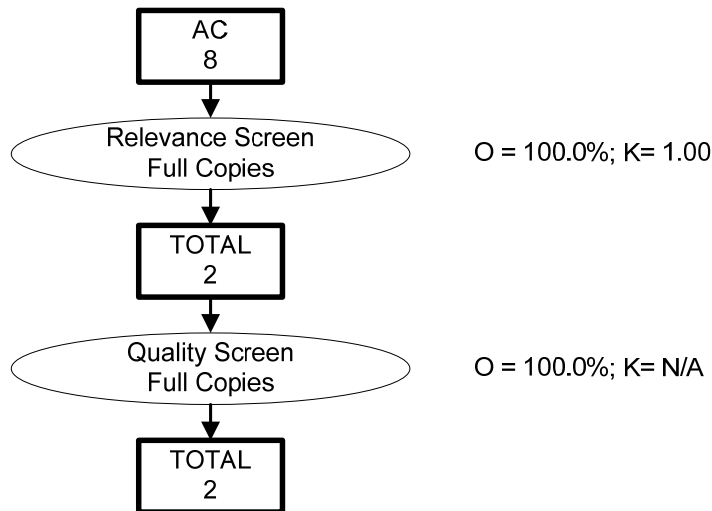

**Figure B.7:** Advisory committee consult results part 2.

With respect to the second part, Figure B.7 shows that two additional articles were selected for further examination due to consulting the advisory committee. Similar to the first part, inter-rater-agreement, as determined by the Kappa statistic, was perfect (1.00 and N/A) for all screening activities.

In total, 51 studies were selected for further examination with regard to the first part (primary search: 32; secondary search: 18; advisory committee consult: 1). With respect to the second part, 13 studies were selected for further examination (primary search: 9; secondary search: 2; advisory committee consult: 2). A further examination of all 64 studies (first part: 51; second part: 13) revealed that two articles of the first part could be excluded because these reports were predecessors of other articles and did not contain any new information. Furthermore, one report of the first part was an appendix that we decided to merge with the main publication that was also part of our set of included studies. Hence, our final set contained 61 unique studies.

### 3. References

Fink A (2010) Conducting research literature reviews: from the internet to paper, 3rd ed. Sage Publications, London, UK

## Appendix C: Context Element Codings per Study

| P | ID   | Title                                                                                                           | Journal                                                      | Authors                                 | Year | Study.Source  | Study.Type               | Study.Label                    |
|---|------|-----------------------------------------------------------------------------------------------------------------|--------------------------------------------------------------|-----------------------------------------|------|---------------|--------------------------|--------------------------------|
| 1 | 642  | Business process redesign in healthcare: towards a structured approach                                          | INFOR                                                        | MH Jansen-Vullers; HA Reijers           | 2005 | Journal paper | Method development study | Business Process Redesign      |
| 1 | 664  | A TRIZ-based method for new service design                                                                      | Journal of Service Research                                  | K-H Chai; J Zhang; K-C Tan              | 2005 | Journal paper | Method development study | New Service Development        |
| 1 | 865  | A consolidated methodology for business process reengineering                                                   | International Journal of Computer Applications in Technology | JYL Thong; C-S Yap; KL Seah             | 2003 | Journal paper | Method development study | Business Process Reengineering |
| 1 | 1073 | Visualized guidelines for IT-enabled process change                                                             | Information Resources Management Journal                     | MR Hoogeweegen                          | 2000 | Journal paper | Method development study | Business Process Change        |
| 1 | 1076 | An intelligent tool for process redesign: manufacturing supply-chain applications                               | International Journal of Flexible Manufacturing Systems      | ME Nissen                               | 2000 | Journal paper | Method development study | No label                       |
| 1 | 1111 | New approaches to business process redesign: a case study of collaborative group technology and service mapping | Group Decision and Negotiation                               | GF Corbitt; M Christopolus; L Wright    | 2000 | Journal paper | Method development study | Business Process Redesign      |
| 1 | 1331 | Business process change: a study of methodologies, techniques, and tools                                        | MIS Quarterly                                                | WJ Kettinger; JTC Teng; S Guha          | 1997 | Journal paper | Method review study      | Business Process Reengineering |
| 1 | 1464 | Methodology-driven use of automated support in business process re-engineering                                  | Journal of Management Information Systems                    | AR Dennis; RM Daniels Jr; G Hayes et al | 1994 | Journal paper | Method development study | Business Process Reengineering |



|   |      |                                                                                                 |                                                |                                       |      |                  |                          |                                |
|---|------|-------------------------------------------------------------------------------------------------|------------------------------------------------|---------------------------------------|------|------------------|--------------------------|--------------------------------|
| 1 | 1616 | Applying Lean Six Sigma and TRIZ methodology in banking services                                | Total Quality Management & Business Excellence | F-K Wang; K-S Chen                    | 2010 | Journal paper    | Method development study | Lean Six Sigma                 |
| 1 | 1768 | ARMA: a multi-disciplinary approach to BPR                                                      | Knowledge and Process Management               | M Glykas; G Valiris                   | 1999 | Journal paper    | Method development study | Business Process Redesign      |
| 1 | 1771 | Critical review of existing BPR methodologies: the need for a holistic approach                 | Business Process Management Journal            | G Valiris; M Glykas                   | 1999 | Journal paper    | Method development study | Business Process Redesign      |
| 1 | 1774 | Process reverse engineering for BPR: a form-based approach                                      | Information & Management                       | K-H Kim; Y-G Kim                      | 1998 | Journal paper    | Method development study | Business Process Redesign      |
| 1 | 1819 | Metrics-based process redesign with the MIT process handbook                                    | Knowledge and Process Management               | A Margherita; M Klein; G Elia         | 2007 | Journal paper    | Method development study | Business Process Reengineering |
| 1 | 1973 | A structured evaluation of business process improvement approaches                              | Business Process Management Journal            | G Zellner                             | 2011 | Journal paper    | Method review study      | Business Process Improvement   |
| 1 | 1989 | A Service Experience Engineering (SEE) method for developing new services                       | International Journal of Management            | S-L Hsiao; H-L Yang                   | 2010 | Journal paper    | Method development study | Service Engineering            |
| 1 | 2085 | A handbook-based methodology for redesigning business processes                                 | Knowledge and Process Management               | M Klein; C Petti                      | 2006 | Journal paper    | Method development study | Business Process Reengineering |
| 1 | 2089 | Service blueprinting: a practical technique for service innovation                              | California Management Review                   | MJ Bitner; AL Ostrom; FN Morgan       | 2008 | Journal paper    | Method development study | Service Innovation             |
| 1 | 2149 | Multilevel service design: From customer value constellation to service experience blueprinting | Journal of Service Research                    | L Patrício; RP Fisk; JF e Cunha et al | 2011 | Journal paper    | Method development study | Service Design                 |
| 1 | 2225 | Systematic improvement in service quality through TRIZ methodology: an exploratory study        | Total Quality Management & Business Excellence | C-T Su; C-S Lin; T-L Chiang           | 2008 | Journal paper    | Method development study | New Service Development        |
| 1 | 2428 | PAWS: towards a participatory approach to business process reengineering                        | International Workshop on Groupware            | MRS Borges; JA Pino                   | 1999 | Conference paper | Method development study | Business Process Reengineering |

|   |      |                                                                                                                                 |                                                                                    |                                            |      |                  |                          |                                |
|---|------|---------------------------------------------------------------------------------------------------------------------------------|------------------------------------------------------------------------------------|--------------------------------------------|------|------------------|--------------------------|--------------------------------|
| 1 | 2530 | An innovative way to create new services: applying the TRIZ methodology                                                         | Journal of the Chinese Institute of Industrial Engineers                           | C-S Lin; C-T Su                            | 2007 | Journal paper    | Method development study | New Service Development        |
| 1 | 2560 | Enhancing business process redesign: using tools to condense the process                                                        | Hawaii International Conference on System Sciences                                 | G Corbitt; L Wright                        | 1997 | Conference paper | Method development study | Business Process Redesign      |
| 1 | 3136 | Tools for inventing organizations: toward a handbook of organizational processes                                                | Management Science                                                                 | TW Malone; K Crowston; J Lee et al         | 1999 | Journal paper    | Method development study | No label                       |
| 1 | 3137 | Tools for inventing organizations: toward a handbook of organizational processes                                                | Workshop on Enabling Technologies: Infrastructure for Collaborative Enterprises    | TW Malone; K Crowston; J Lee et al         | 1993 | Conference paper | Method development study | No label                       |
| 1 | 3200 | A groupware tool to support participatory business process reengineering                                                        | International Workshop on Groupware                                                | EZ Mouro; MRS Borges; CR Garcez            | 1999 | Conference paper | Method development study | Business Process Reengineering |
| 1 | 3227 | Intelligent tools for workflow process redesign: a research agenda                                                              | International Conference on Business Process Management                            | M Netjes; I Vanderfeesten; HA Reijers      | 2006 | Conference paper | Method development study | Business Process Redesign      |
| 1 | 3298 | Improving the effectiveness of business process development through collaboration engineering: a method for process elicitation | Hawaii International Conference on System Sciences                                 | K Piirainen; K Elfvengren; J Korpela et al | 2009 | Conference paper | Method development study | Business Process Reengineering |
| 1 | 3408 | Process life cycle engineering: a knowledge-based approach and environment                                                      | International Journal of Intelligent Systems in Accounting, Finance and Management | W Scacchi; P Mi                            | 1997 | Journal paper    | Method development study | Process Life Cycle Engineering |
| 1 | 3440 | A decision-based approach to business process improvement                                                                       | International Conference on Systems, Man and Cybernetics                           | K Shahzad; J Zdravkovic                    | 2010 | Conference paper | Method development study | Business Process Improvement   |

|   |       |                                                                                                               |                                                                  |                                         |      |                  |                          |                                |
|---|-------|---------------------------------------------------------------------------------------------------------------|------------------------------------------------------------------|-----------------------------------------|------|------------------|--------------------------|--------------------------------|
| 1 | 3447  | Workflow reengineering: a methodology for business process reengineering using workflow management technology | Hawaii International Conference on System Sciences               | LTSM Bitzer; MN Kamel                   | 1997 | Conference paper | Method development study | Workflow Reengineering         |
| 1 | 3469  | Service/product engineering as a potential approach to value enhancement in supply chains                     | Progress in Industrial Ecology - An International Journal        | A Simboli; A Raggi; L Petti et al.      | 2008 | Journal paper    | Method development study | Service Engineering            |
| 1 | BFT01 | Participatory business process reengineering design: generating solutions                                     | International Conference of the Chilean Computer Science Society | F Albano; JA Pino; MRS Borges           | 2001 | Conference paper | Method development study | Business Process Reengineering |
| 1 | BFT02 | The process recombinator: a tool for generating new business process ideas                                    | International Conference on Information Systems                  | A Bernstein; M Klein; TW Malone         | 1999 | Conference paper | Method development study | No label                       |
| 1 | BFT03 | Analysis of techniques for business process improvement                                                       | European Conference on Information Systems                       | P Griesberger; S Leist; G Zellner       | 2011 | Conference paper | Method review study      | Business Process Improvement   |
| 1 | BFT04 | Selecting the best strategic practices for business process redesign                                          | Business Process Management Journal                              | P Hanafizadeh; M Moosakhani; J Bakhshi  | 2009 | Journal paper    | Method development study | Business Process Redesign      |
| 1 | BFT06 | Grammatical approach to organizational design                                                                 | MIT Center for Coordination Science Technical Report             | J Lee; BT Pentland                      | 2000 | Technical report | Method development study | No label                       |
| 1 | BFT07 | Case-based reasoning as a technique for knowledge management in business process redesign                     | Electronic Journal on Knowledge Management                       | S Limam Mansar; F Marir; HA Reijers     | 2003 | Journal paper    | Method development study | Business Process Redesign      |
| 1 | BFT08 | Development of a decision-making strategy to improve the efficiency of BPR                                    | Expert Systems with Applications                                 | S Limam Mansar; H A Reijers; F Ounnar   | 2009 | Journal paper    | Method development study | Business Process Redesign      |
| 1 | BFT09 | On the formal generation of process redesigns                                                                 | International Conference on Business Process Management          | M Netjes; HA Reijers; WMP van der Aalst | 2009 | Conference paper | Method development study | Business Process Redesign      |

|   |       |                                                                                                                       |                                                                               |                                                    |      |                  |                          |                                |
|---|-------|-----------------------------------------------------------------------------------------------------------------------|-------------------------------------------------------------------------------|----------------------------------------------------|------|------------------|--------------------------|--------------------------------|
| 1 | BFT10 | Performing business process redesign with best practices: an evolutionary approach                                    | International Conference on Enterprise Information Systems                    | M Netjes; S Limam Mansar; HA Reijers et al         | 2009 | Conference paper | Method development study | Business Process Redesign      |
| 1 | BFT11 | Best practices in business process redesign: an overview and qualitative evaluation of successful redesign heuristics | Omega                                                                         | HA Reijers; S Limam Mansar                         | 2005 | Journal paper    | Method development study | Business Process Redesign      |
| 1 | BFT12 | A tutorial on business process improvement                                                                            | Journal of Operations Management                                              | TR Rohleder; EA Silver                             | 1997 | Journal paper    | Method development study | Business Process Improvement   |
| 1 | BFT13 | Towards a goal-driven approach for business process improvement using process-oriented data warehouse                 | International Conference on Business Information Systems                      | K Shahzad; C Giannoulis                            | 2011 | Conference paper | Method development study | Business Process Improvement   |
| 1 | BFT18 | Designing robust business processes                                                                                   | Organizing business knowledge: The MIT process handbook                       | M Klein; C Dellarocas                              | 2003 | Book chapter     | Method development study | No label                       |
| 1 | BFT19 | Process grammar as a tool for business process design                                                                 | MIS Quarterly                                                                 | J Lee; GM Wyner; BT Pentland                       | 2008 | Journal paper    | Method development study | No label                       |
| 1 | BFT20 | The PrICE Tool Kit: tool support for process improvement                                                              | International Conference on Business Process Management                       | M Netjes; HA Reijers; WMP van der Aalst            | 2010 | Conference paper | Method development study | No label                       |
| 1 | BFT21 | Development of a hybrid model to improve the efficiency of business process reengineering                             | International Conference on Industrial Engineering and Engineering Management | W-H Tsai; C-C Yang; H-C Kuo                        | 2009 | Conference paper | Method development study | Business Process Reengineering |
| 1 | AC4   | Model-based support for business re-engineering                                                                       | Information and Software Technology                                           | S Jarzabek; TW Ling                                | 1996 | Journal paper    | Method development study | Business Re-engineering        |
| 2 | 176   | Empirically testing determinants of hospital BPR success                                                              | International Journal of Health Care Quality Assurance                        | M Do Carmo Caccia-Bava; VCK Guimaraes; T Guimaraes | 2005 | Journal paper    | Success factor study     | Business Process Reengineering |

|   |      |                                                                                                                                  |                                                                    |                                          |      |                  |                      |                                |
|---|------|----------------------------------------------------------------------------------------------------------------------------------|--------------------------------------------------------------------|------------------------------------------|------|------------------|----------------------|--------------------------------|
| 2 | 627  | An examination of the role of organizational enablers in business process reengineering and the impact of information technology | Information Resources Management Journal                           | HR Ahadi                                 | 2004 | Journal paper    | Success factor study | Business Process Reengineering |
| 2 | 834  | Business process change and organizational performance: exploring an antecedent model                                            | Journal of Management Information Systems                          | S Guha; V Grover; WJ Kettinger et al     | 1997 | Journal paper    | Success factor study | Business Process Change        |
| 2 | 836  | Empirically testing the antecedents of BPR success                                                                               | International Journal of Production Economics                      | T Guimaraes                              | 1997 | Journal paper    | Success factor study | Business Process Reengineering |
| 2 | 870  | Critical factors for the effectiveness of clinical pathway in improving care outcomes                                            | International Conference on Service Systems and Service Management | J Shi; Q Su; Z Zhao                      | 2008 | Conference paper | Success factor study | Clinical pathways              |
| 2 | 1286 | Critical success factors of TQM in service organizations: a proposed model                                                       | Services Marketing Quarterly                                       | F Talib; Z Rahman                        | 2010 | Journal paper    | Success factor study | Total Quality Management       |
| 2 | 1661 | The state of business process reengineering: a search for success factors                                                        | Total Quality Management & Business Excellence                     | D Paper; R-D Chang                       | 2005 | Journal paper    | Success factor study | Business Process Reengineering |
| 2 | 1672 | Breaking the rules: success and failure in groupware-supported business process reengineering                                    | Decision Support Systems                                           | AR Dennis; TA Carte; GG Kelly            | 2003 | Journal paper    | Success factor study | Business Process Reengineering |
| 2 | 2059 | Is there a future for pathways? Five pieces of the puzzle                                                                        | International Journal of Care Pathways                             | K Vanhaecht; M Panella; R van Zelm et al | 2009 | Journal paper    | Success factor study | Care pathways                  |
| 2 | BFT3 | Collaborative business engineering: a decade of lessons from the field                                                           | Journal of Management Information Systems                          | M Hengst; GJ de Vreede                   | 2004 | Journal paper    | Success factor study | Business Process Reengineering |
| 2 | BFT7 | Prevalence and use of clinical pathways in 23 countries - an international survey by the European Pathway Association            | International Journal of Care Pathways                             | K Vanhaecht; M Bollmann; K Bower et al   | 2006 | Journal paper    | Success factor study | Clinical pathways              |

|   |     |                                                                               |                                                             |                                        |      |               |                      |                                |
|---|-----|-------------------------------------------------------------------------------|-------------------------------------------------------------|----------------------------------------|------|---------------|----------------------|--------------------------------|
| 2 | AC2 | The implementation of business process reengineering                          | Journal of Management Information Systems                   | V Grover; SR Jeong; WJ Kettinger et al | 1995 | Journal paper | Success factor study | Business Process Reengineering |
| 2 | AC7 | Business process reengineering: application and success - an Australian study | International Journal of Operations & Production Management | P O'Neill; AS Sohal                    | 1998 | Journal paper | Success factor study | Business Process Reengineering |

**Table C.1:** Context element codings per study (Study.Source, Study.Type, Study.Label). P = Part.

| P | ID   | Title                                                                                                           | Journal                                                      | Authors                                 | Year | Study.Design                                             | Study.Collection                                                                                                                                                                   | Study.Analysis                                                        |
|---|------|-----------------------------------------------------------------------------------------------------------------|--------------------------------------------------------------|-----------------------------------------|------|----------------------------------------------------------|------------------------------------------------------------------------------------------------------------------------------------------------------------------------------------|-----------------------------------------------------------------------|
| 1 | 642  | Business process redesign in healthcare: towards a structured approach                                          | INFOR                                                        | MH Jansen-Vullers; HA Reijers           | 2005 | Literature review (build)<br>Case study (evaluation)     | Simulation (case study)                                                                                                                                                            | Descriptive analysis (case study)                                     |
| 1 | 664  | A TRIZ-based method for new service design                                                                      | Journal of Service Research                                  | K-H Chai; J Zhang; K-C Tan              | 2005 | Literature review (build)<br>Case study (2) (evaluation) | -                                                                                                                                                                                  | -                                                                     |
| 1 | 865  | A consolidated methodology for business process reengineering                                                   | International Journal of Computer Applications in Technology | JYL Thong; C-S Yap; KL Seah             | 2003 | Literature review (build)                                | -                                                                                                                                                                                  | -                                                                     |
| 1 | 1073 | Visualized guidelines for IT-enabled process change                                                             | Information Resources Management Journal                     | MR Hoogeweegen                          | 2000 | Literature review (build)<br>Case study (evaluation)     | -                                                                                                                                                                                  | -                                                                     |
| 1 | 1076 | An intelligent tool for process redesign: manufacturing supply-chain applications                               | International Journal of Flexible Manufacturing Systems      | ME Nissen                               | 2000 | Literature review (build)<br>Case study (evaluation)     | Simulation (case study)                                                                                                                                                            | Descriptive analysis (case study)                                     |
| 1 | 1111 | New approaches to business process redesign: a case study of collaborative group technology and service mapping | Group Decision and Negotiation                               | GF Corbitt; M Christopolus; L Wright    | 2000 | Literature review (build)<br>Case study (evaluation)     | Interviews (case study)<br>Observations (case study)<br>Questionnaires (case study)<br>Time measurements (case study)                                                              | Descriptive analysis (case study)                                     |
| 1 | 1331 | Business process change: a study of methodologies, techniques, and tools                                        | MIS Quarterly                                                | WJ Kettinger; JTC Teng; S Guha          | 1997 | Literature review<br>Field study<br>Lab study            | Literature review approach (literature review)<br>Document and software analysis (field study)<br>Interviews (field study)<br>Semi-structured (telephone) interviews (field study) | Structured analysis approach (no specific name)<br>Q-sort (lab study) |
| 1 | 1464 | Methodology-driven use of automated support in business process re-engineering                                  | Journal of Management Information Systems                    | AR Dennis; RM Daniels Jr; G Hayes et al | 1994 | Literature review (build)<br>Case study (evaluation)     | Documentation analysis (case study)<br>Interviews (case study)<br>Observations (case study)<br>Questionnaires (case study)                                                         | Descriptive analysis (case study)                                     |
| 1 | 1616 | Applying Lean Six Sigma and TRIZ methodology in banking services                                                | Total Quality Management & Business Excellence               | F-K Wang; K-S Chen                      | 2010 | Literature review (build)<br>Case study (evaluation)     | Time measurements (case study)                                                                                                                                                     | Descriptive analysis (case study)                                     |

|   |      |                                                                                                 |                                                          |                                       |      |                                                          |                             |                                   |
|---|------|-------------------------------------------------------------------------------------------------|----------------------------------------------------------|---------------------------------------|------|----------------------------------------------------------|-----------------------------|-----------------------------------|
| 1 | 1768 | ARMA: a multi-disciplinary approach to BPR                                                      | Knowledge and Process Management                         | M Glykas; G Valiris                   | 1999 | Literature review (build)                                | -                           | -                                 |
| 1 | 1771 | Critical review of existing BPR methodologies: the need for a holistic approach                 | Business Process Management Journal                      | G Valiris; M Glykas                   | 1999 | Literature review (build)                                | -                           | -                                 |
| 1 | 1774 | Process reverse engineering for BPR: a form-based approach                                      | Information & Management                                 | K-H Kim; Y-G Kim                      | 1998 | Literature review (build)<br>Case study (evaluation)     | -                           | -                                 |
| 1 | 1819 | Metrics-based process redesign with the MIT process handbook                                    | Knowledge and Process Management                         | A Margherita; M Klein; G Elia         | 2007 | Literature review (build)<br>Illustration (evaluation)   | -                           | -                                 |
| 1 | 1973 | A structured evaluation of business process improvement approaches                              | Business Process Management Journal                      | G Zellner                             | 2011 | Literature review                                        | Literature review approach  | Qualitative content analysis      |
| 1 | 1989 | A Service Experience Engineering (SEE) method for developing new services                       | International Journal of Management                      | S-L Hsiao; H-L Yang                   | 2010 | Literature review (build)<br>Field study (build)         | -                           | -                                 |
| 1 | 2085 | A handbook-based methodology for redesigning business processes                                 | Knowledge and Process Management                         | M Klein; C Petti                      | 2006 | Literature review (build)<br>Illustration (evaluation)   | -                           | -                                 |
| 1 | 2089 | Service blueprinting: a practical technique for service innovation                              | California Management Review                             | MJ Bitner; AL Ostrom; FN Morgan       | 2008 | Literature review (build)<br>Case study (5) (evaluation) | -                           | -                                 |
| 1 | 2149 | Multilevel service design: From customer value constellation to service experience blueprinting | Journal of Service Research                              | L Patrício; RP Fisk; JF e Cunha et al | 2011 | Literature review (build)<br>Case study (2) (evaluation) | -                           | -                                 |
| 1 | 2225 | Systematic improvement in service quality through TRIZ methodology: an exploratory study        | Total Quality Management & Business Excellence           | C-T Su; C-S Lin; T-L Chiang           | 2008 | Literature review (build)<br>Case study (evaluation)     | Questionnaires (case study) | Descriptive analysis (case study) |
| 1 | 2428 | PAWS: towards a participatory approach to business process reengineering                        | International Workshop on Groupware                      | MRS Borges; JA Pino                   | 1999 | Literature review (build)                                | -                           | -                                 |
| 1 | 2530 | An innovative way to create new services: applying the TRIZ methodology                         | Journal of the Chinese Institute of Industrial Engineers | C-S Lin; C-T Su                       | 2007 | Literature review (build)<br>Case study (evaluation)     | Questionnaires (case study) | Descriptive analysis (case study) |



|   |      |                                                                                                                                 |                                                                                    |                                            |      |                                                        |                                                                                     |                                   |
|---|------|---------------------------------------------------------------------------------------------------------------------------------|------------------------------------------------------------------------------------|--------------------------------------------|------|--------------------------------------------------------|-------------------------------------------------------------------------------------|-----------------------------------|
| 1 | 2560 | Enhancing business process redesign: using tools to condense the process                                                        | Hawaii International Conference on System Sciences                                 | G Corbitt; L Wright                        | 1997 | Literature review (build)<br>Case study (evaluation)   | Questionnaires (case study)<br>Time measurements (case study)                       | Descriptive analysis (case study) |
| 1 | 3136 | Tools for inventing organizations: toward a handbook of organizational processes                                                | Management Science                                                                 | TW Malone; K Crowston; J Lee et al         | 1999 | Literature review (build)<br>Case study (evaluation)   | -                                                                                   | -                                 |
| 1 | 3137 | Tools for inventing organizations: toward a handbook of organizational processes                                                | Workshop on Enabling Technologies: Infrastructure for Collaborative Enterprises    | TW Malone; K Crowston; J Lee et al         | 1993 | Literature review (build)<br>Illustration (evaluation) | -                                                                                   | -                                 |
| 1 | 3200 | A groupware tool to support participatory business process reengineering                                                        | International Workshop on Groupware                                                | EZ Mouro; MRS Borges; CR Garcez            | 1999 | Literature review (build)                              | -                                                                                   | -                                 |
| 1 | 3227 | Intelligent tools for workflow process redesign: a research agenda                                                              | International Conference on Business Process Management                            | M Netjes; I Vanderfeesten; HA Reijers      | 2006 | Literature review (build)<br>Illustration (evaluation) | -                                                                                   | -                                 |
| 1 | 3298 | Improving the effectiveness of business process development through collaboration engineering: a method for process elicitation | Hawaii International Conference on System Sciences                                 | K Piirainen; K Elfvengren; J Korpela et al | 2009 | Literature review (build)<br>Case study (evaluation)   | Interviews (case study)<br>Observations (case study)<br>Questionnaires (case study) | Descriptive analysis (case study) |
| 1 | 3408 | Process life cycle engineering: a knowledge-based approach and environment                                                      | International Journal of Intelligent Systems in Accounting, Finance and Management | W Scacchi; P Mi                            | 1997 | Literature review (build)<br>Case study (evaluation)   | -                                                                                   | -                                 |
| 1 | 3440 | A decision-based approach to business process improvement                                                                       | International Conference on Systems, Man and Cybernetics                           | K Shahzad; J Zdravkovic                    | 2010 | Literature review (build)<br>Illustration (evaluation) | -                                                                                   | -                                 |
| 1 | 3447 | Workflow reengineering: a methodology for business process reengineering using workflow management                              | Hawaii International Conference on System Sciences                                 | LTSM Bitzer; MN Kamel                      | 1997 | Literature review (build)<br>Case study (evaluation)   | -                                                                                   | -                                 |

|   |       |                                                                                           |                                                                  |                                            |      |                                                           |                            |                                                 |
|---|-------|-------------------------------------------------------------------------------------------|------------------------------------------------------------------|--------------------------------------------|------|-----------------------------------------------------------|----------------------------|-------------------------------------------------|
|   |       | technology                                                                                |                                                                  |                                            |      |                                                           |                            |                                                 |
| 1 | 3469  | Service/product engineering as a potential approach to value enhancement in supply chains | Progress in Industrial Ecology - An International Journal        | A Simboli; A Raggi; L Petti et al.         | 2008 | Literature review (build)<br>Case study (evaluation)      | -                          | -                                               |
| 1 | BFT01 | Participatory business process reengineering design: generating solutions                 | International Conference of the Chilean Computer Science Society | F Albano; JA Pino; MRS Borges              | 2001 | Literature review (build)                                 | -                          | -                                               |
| 1 | BFT02 | The process recombinator: a tool for generating new business process ideas                | International Conference on Information Systems                  | A Bernstein; M Klein; TW Malone            | 1999 | Literature review (build)<br>Case study (evaluation)      | -                          | -                                               |
| 1 | BFT03 | Analysis of techniques for business process improvement                                   | European Conference on Information Systems                       | P Griesberger; S Leist; G Zellner          | 2011 | Literature review                                         | Literature review approach | Structured analysis approach (no specific name) |
| 1 | BFT04 | Selecting the best strategic practices for business process redesign                      | Business Process Management Journal                              | P Hanafizadeh; M Moosakhani; J Bakhshi     | 2009 | Literature review (build)<br>Case study (evaluation)      | -                          | -                                               |
| 1 | BFT06 | Grammatical approach to organizational design                                             | MIT Center for Coordination Science Technical Report             | J Lee; BT Pentland                         | 2000 | Literature review (build)<br>Illustration (evaluation)    | -                          | -                                               |
| 1 | BFT07 | Case-based reasoning as a technique for knowledge management in business process redesign | Electronic Journal on Knowledge Management                       | S Limam Mansar; F Marir; HA Reijers        | 2003 | Literature review (build)                                 | -                          | -                                               |
| 1 | BFT08 | Development of a decision-making strategy to improve the efficiency of BPR                | Expert Systems with Applications                                 | S Limam Mansar; H A Reijers; F Ounnar      | 2009 | Literature review (build)<br>Case study (evaluation)      | -                          | Descriptive analysis (case study)               |
| 1 | BFT09 | On the formal generation of process redesigns                                             | International Conference on Business Process Management          | M Netjes; HA Reijers; WMP van der Aalst    | 2009 | Literature review (build)<br>Formal analysis (evaluation) | -                          | Formal analysis                                 |
| 1 | BFT10 | Performing business process redesign with best practices: an evolutionary approach        | International Conference on Enterprise Information Systems       | M Netjes; S Limam Mansar; HA Reijers et al | 2009 | Literature review (build)<br>Illustration (evaluation)    | -                          | -                                               |

|   |       |                                                                                                                       |                                                                               |                                                    |      |                                                        |                               |                                                                                                                                   |
|---|-------|-----------------------------------------------------------------------------------------------------------------------|-------------------------------------------------------------------------------|----------------------------------------------------|------|--------------------------------------------------------|-------------------------------|-----------------------------------------------------------------------------------------------------------------------------------|
| 1 | BFT11 | Best practices in business process redesign: an overview and qualitative evaluation of successful redesign heuristics | Omega                                                                         | HA Reijers; S Limam Mansar                         | 2005 | Literature review (build)                              | -                             | Structured analysis approach (no specific name)                                                                                   |
| 1 | BFT12 | A tutorial on business process improvement                                                                            | Journal of Operations Management                                              | TR Rohleder; EA Silver                             | 1997 | Literature review (build)                              | -                             | -                                                                                                                                 |
| 1 | BFT13 | Towards a goal-driven approach for business process improvement using process-oriented data warehouse                 | International Conference on Business Information Systems                      | K Shahzad; C Giannoulis                            | 2011 | Literature review (build)<br>Case study (evaluation)   | Questionnaires (case study)   | Descriptive analysis (case study)                                                                                                 |
| 1 | BFT18 | Designing robust business processes                                                                                   | Organizing business knowledge: The MIT process handbook                       | M Klein; C Dellarocas                              | 2003 | Literature review (build)<br>Illustration (evaluation) | -                             | -                                                                                                                                 |
| 1 | BFT19 | Process grammar as a tool for business process design                                                                 | MIS Quarterly                                                                 | J Lee; GM Wyner; BT Pentland                       | 2008 | Literature review (build)<br>Illustration (evaluation) | -                             | -                                                                                                                                 |
| 1 | BFT20 | The PRICE Tool Kit: tool support for process improvement                                                              | International Conference on Business Process Management                       | M Netjes; HA Reijers; WMP van der Aalst            | 2010 | Literature review (build)<br>Illustration (evaluation) | -                             | -                                                                                                                                 |
| 1 | BFT21 | Development of a hybrid model to improve the efficiency of business process reengineering                             | International Conference on Industrial Engineering and Engineering Management | W-H Tsai; C-C Yang; H-C Kuo                        | 2009 | Literature review (build)<br>Case study (evaluation)   | -                             | -                                                                                                                                 |
| 1 | AC4   | Model-based support for business re-engineering                                                                       | Information and Software Technology                                           | S Jarzabek; TW Ling                                | 1996 | Literature review (build)                              | -                             | -                                                                                                                                 |
| 2 | 176   | Empirically testing determinants of hospital BPR success                                                              | International Journal of Health Care Quality Assurance                        | M Do Carmo Caccia-Bava; VCK Guimaraes; T Guimaraes | 2005 | Literature review<br>Field survey                      | Questionnaires (field survey) | Descriptive analysis (field survey)<br>Factor analysis (field survey)<br>Stepwise multivariate regression analysis (field survey) |

|   |      |                                                                                                                                  |                                                                    |                                          |      |                                     |                                                                                                                  |                                                              |
|---|------|----------------------------------------------------------------------------------------------------------------------------------|--------------------------------------------------------------------|------------------------------------------|------|-------------------------------------|------------------------------------------------------------------------------------------------------------------|--------------------------------------------------------------|
| 2 | 627  | An examination of the role of organizational enablers in business process reengineering and the impact of information technology | Information Resources Management Journal                           | HR Ahadi                                 | 2004 | Literature review<br>Field survey   | Questionnaires (field survey)                                                                                    | Descriptive analysis (field survey)<br>ANOVA (field survey)  |
| 2 | 834  | Business process change and organizational performance: exploring an antecedent model                                            | Journal of Management Information Systems                          | S Guha; V Grover; WJ Kettinger et al     | 1997 | Literature review<br>Case study (3) | Document analysis (case study)<br>Questionnaires (case study)<br>(Telephone) interviews (case study)             | Explanation building and pattern matching (case study)       |
| 2 | 836  | Empirically testing the antecedents of BPR success                                                                               | International Journal of Production Economics                      | T Guimaraes                              | 1997 | Literature review<br>Field survey   | Questionnaires (field survey)                                                                                    | Descriptive analysis (field survey)                          |
| 2 | 870  | Critical factors for the effectiveness of clinical pathway in improving care outcomes                                            | International Conference on Service Systems and Service Management | J Shi; Q Su; Z Zhao                      | 2008 | Literature review                   | Literature review approach                                                                                       |                                                              |
| 2 | 1286 | Critical success factors of TQM in service organizations: a proposed model                                                       | Services Marketing Quarterly                                       | F Talib; Z Rahman                        | 2010 | Literature review                   | Literature review approach                                                                                       |                                                              |
| 2 | 1661 | The state of business process reengineering: a search for success factors                                                        | Total Quality Management & Business Excellence                     | D Paper; R-D Chang                       | 2005 | Literature review<br>Case study     | -                                                                                                                | Structured analysis approach (no specific name) (case study) |
| 2 | 1672 | Breaking the rules: success and failure in groupware-supported business process reengineering                                    | Decision Support Systems                                           | AR Dennis; TA Carte; GG Kelly            | 2003 | Literature review<br>Case study (4) | Interviews (case study)<br>Observations (case study)                                                             | -                                                            |
| 2 | 2059 | Is there a future for pathways? Five pieces of the puzzle                                                                        | International Journal of Care Pathways                             | K Vanhaecht; M Panella; R van Zelm et al | 2009 | Literature review                   | -                                                                                                                | -                                                            |
| 2 | BFT3 | Collaborative business engineering: a decade of lessons from the field                                                           | Journal of Management Information Systems                          | M Hengst; GJ de Vreede                   | 2004 | Literature review<br>Case study (9) | Interviews (case study)<br>Observations (case study)<br>Questionnaires (case study)<br>Session data (case study) | Structured analysis approach (no specific name) (case study) |
| 2 | BFT7 | Prevalence and use of clinical pathways in 23 countries - an international survey by the European Pathway Association            | International Journal of Care Pathways                             | K Vanhaecht; M Bollmann; K Bower et al   | 2006 | Field survey                        | Questionnaires (field survey)                                                                                    | Descriptive analysis (field survey)                          |

|   |     |                                                                               |                                                             |                                        |      |                                                  |                                                                                                             |                                                                                                                      |
|---|-----|-------------------------------------------------------------------------------|-------------------------------------------------------------|----------------------------------------|------|--------------------------------------------------|-------------------------------------------------------------------------------------------------------------|----------------------------------------------------------------------------------------------------------------------|
| 2 | AC2 | The implementation of business process reengineering                          | Journal of Management Information Systems                   | V Grover; SR Jeong; WJ Kettinger et al | 1995 | Literature review<br>Field study<br>Field survey | Interviews (field study)<br>Literature review approach (literature review)<br>Questionnaires (field survey) | Q-sort procedure (field study)<br>Descriptive analysis (field survey)<br>Principal component analysis (field survey) |
| 2 | AC7 | Business process reengineering: application and success - an Australian study | International Journal of Operations & Production Management | P O'Neill; AS Sohal                    | 1998 | Literature review<br>Field survey                | Questionnaires (field survey)                                                                               | Descriptive analysis (field survey)                                                                                  |

**Table C.2:** Context element codings per study (Study.Design, Study.Collection, Study.Analysis). P = Part.

# Appendix D: Details Methodological Framework

---

## 1. Introduction

In this appendix, the developed methodological framework is presented in detail. The developed methodological framework contains an overview of 60 method options for six key choices to be made with regard to a method for generating process improvement ideas: aim (8), actors (11), input (18), output (8), technique (10) and tool (5).

In section two, we present all method options and related (sub-)categories that were identified during the open and axial coding step. In section three, definitions are given for all method options.

## 2. Methodological framework

In Table D.1-3, we present the complete methodological framework as well as a quantitative analysis of the number of citations per method option.

| <i>Decision area</i> | <i>Category</i>        | <i>Sub-category</i>   | <i>Method option</i>    | <i>No. of studies part 1</i> | <i>No. of studies part 2</i> | <i>No. of studies part 1 + 2</i> |
|----------------------|------------------------|-----------------------|-------------------------|------------------------------|------------------------------|----------------------------------|
| Aim                  | Performance dimensions |                       | Revenue                 | 6                            | 7                            | 13                               |
|                      |                        |                       | Costs                   | 31                           | 12                           | 43                               |
|                      |                        |                       | Time                    | 26                           | 11                           | 37                               |
|                      |                        | Quality               | Quality (unspecified)   | 17                           | 4                            | 21                               |
|                      |                        |                       | External quality        | 22                           | 11                           | 33                               |
|                      |                        |                       | Internal quality        | 4                            | 7                            | 11                               |
|                      |                        |                       | Flexibility             | 13                           | 1                            | 14                               |
|                      |                        | Degree of improvement | Radical improvement     | 6                            | 3                            | 9                                |
|                      |                        |                       | Incremental improvement | 6                            | 3                            | 9                                |
|                      |                        | Actors                | Daily involved          |                              | Process actor                | 23                               |
| Management           | 15                     |                       |                         |                              | 7                            | 22                               |
| Advising             | Supporting staff       |                       | BPR specialist          | 4                            | 1                            | 5                                |
|                      |                        |                       | Finance specialist      | 1                            | 1                            | 2                                |
|                      |                        |                       | HR specialist           | 0                            | 1                            | 1                                |
|                      |                        |                       | IS specialist           | 5                            | 5                            | 10                               |
|                      |                        |                       | Marketing specialist    | 1                            | 1                            | 2                                |
|                      |                        |                       | Customer                | 4                            | 7                            | 11                               |
|                      |                        |                       | Supplier                | 1                            | 5                            | 6                                |
|                      |                        |                       | External consultant     | 14                           | 7                            | 21                               |
| Peer                 | 0                      | 1                     | 1                       |                              |                              |                                  |

**Table D.1:** Methodological framework (Aim, Actors).

| <i>Decision area</i> | <i>Category</i>              | <i>Sub-category</i>         | <i>Method option</i>                                     | <i>No. of studies part 1</i> | <i>No. of studies part 2</i> | <i>No. of studies part 1 + 2</i> |
|----------------------|------------------------------|-----------------------------|----------------------------------------------------------|------------------------------|------------------------------|----------------------------------|
| Input                | Redesign requirements        |                             | Process output goals                                     | 27                           | 5                            | 32                               |
|                      |                              |                             | Stakeholder / customer needs                             | 11                           | 5                            | 16                               |
|                      | Redesign limitations         |                             | Constraints                                              | 2                            | 0                            | 2                                |
|                      |                              |                             | Risks                                                    | 2                            | 0                            | 2                                |
|                      | AS-IS process specification  |                             | Textual process description                              | 8                            | 0                            | 8                                |
|                      |                              |                             | Process model                                            | 28                           | 6                            | 34                               |
|                      |                              |                             | Simulation model                                         | 3                            | 1                            | 4                                |
|                      | Process weaknesses           |                             | Process output measures                                  | 14                           | 2                            | 16                               |
|                      |                              |                             | Process measures                                         | 6                            | 0                            | 6                                |
|                      |                              |                             | Different opinions regarding AS-IS process specification | 1                            | 0                            | 1                                |
|                      |                              |                             | Problem investigation                                    | 20                           | 6                            | 26                               |
|                      |                              |                             | Culture scan                                             | 1                            | 0                            | 1                                |
|                      | Redesign catalysts           |                             | Medical guidelines / key interventions                   | 0                            | 2                            | 2                                |
|                      |                              |                             | Previous solutions                                       | 3                            | 0                            | 3                                |
|                      |                              |                             | Benchmark process insights                               | 3                            | 2                            | 5                                |
|                      |                              |                             | Benchmark process models                                 | 1                            | 0                            | 1                                |
|                      |                              | Technology developments     | 4                                                        | 2                            | 6                            |                                  |
|                      |                              | Industry value net          | 1                                                        | 0                            | 1                            |                                  |
|                      |                              |                             |                                                          |                              |                              |                                  |
| Output               | TO-BE specifications         |                             | TO-BE service concepts                                   | 3                            | 0                            | 3                                |
|                      |                              | TO-BE process specification | Summary redesign proposals                               | 19                           | 0                            | 19                               |
|                      | Textual process descriptions |                             | 8                                                        | 0                            | 8                            |                                  |
|                      | Process models               |                             | 26                                                       | 1                            | 27                           |                                  |
|                      | Simulation models            |                             | 11                                                       | 1                            | 12                           |                                  |
|                      | TO-BE exception handlers     |                             | 3                                                        | 0                            | 3                            |                                  |
|                      | TO-BE assessments            |                             | Impact analyses                                          | 17                           | 0                            | 17                               |
|                      |                              |                             | Force-field-analyses                                     | 3                            | 0                            | 3                                |

**Table D.2:** Methodological framework (Input, Output).



| <i>Decision area</i> | <i>Category</i> | <i>Sub-category</i> | <i>Method option</i>    | <i>No. of studies part 1</i> | <i>No. of studies part 2</i> | <i>No. of studies part 1 + 2</i> |
|----------------------|-----------------|---------------------|-------------------------|------------------------------|------------------------------|----------------------------------|
| Technique            | Unstructured    |                     | Brainstorming           | 15                           | 1                            | 16                               |
|                      |                 |                     | Out-of-the-box thinking | 5                            | 1                            | 6                                |
|                      |                 |                     | Visioning               | 4                            | 1                            | 5                                |
|                      |                 |                     | Unspecified             | 16                           | 0                            | 16                               |
|                      | Semi-structured |                     | Delphi                  | 1                            | 0                            | 1                                |
|                      |                 |                     | Nominal group           | 10                           | 0                            | 10                               |
|                      |                 |                     | Multi-level design      | 3                            | 0                            | 3                                |
|                      |                 |                     | Grammar-based           | 4                            | 0                            | 4                                |
|                      | Structured      |                     | Rule-based              | 23                           | 1                            | 24                               |
|                      |                 |                     | Case-based              | 5                            | 0                            | 5                                |
|                      |                 |                     | Repository-based        | 9                            | 0                            | 9                                |
|                      |                 |                     | Communication           | 9                            | 2                            | 11                               |
|                      |                 |                     | Voting                  | 6                            | 1                            | 7                                |
| Tool                 |                 | Modeling            | 13                      | 2                            | 15                           |                                  |
|                      |                 | Simulation          | 8                       | 1                            | 9                            |                                  |
|                      |                 | Repository          | 19                      | 2                            | 21                           |                                  |
|                      |                 | Specific            | 4                       | 0                            | 4                            |                                  |
|                      |                 |                     |                         |                              |                              |                                  |

**Table D.3:** Methodological framework (Technique, Tool).

### 3. Definitions method options

All method option definitions with regard to the methodological decision areas aim, actors, input, output, technique and tool are shown in Table D.4-9.

| Method option                                                                                      | Definition                                                                                                                                                |
|----------------------------------------------------------------------------------------------------|-----------------------------------------------------------------------------------------------------------------------------------------------------------|
| <i>Performance dimensions</i> (delineating the kind of performance measures that need improvement) |                                                                                                                                                           |
| Revenue                                                                                            | The income that is received from the sales of goods or services that are created by the process.                                                          |
| Costs                                                                                              | The value of money that has been used to produce goods or services that are created by the process.                                                       |
| Time                                                                                               | A measure of durations of events or intervals between them.                                                                                               |
| External quality                                                                                   | The quality of products or services as perceived by customers.                                                                                            |
| Internal quality                                                                                   | The quality of work as perceived by process actors.                                                                                                       |
| Flexibility                                                                                        | The ability of the process to react to changes (Jansen-Vullers et al 2008).                                                                               |
| <i>Degree of improvement</i> (addressing the kind of improvement that is needed)                   |                                                                                                                                                           |
| Radical improvement                                                                                | The aim is to achieve dramatic improvement gains by often challenging the organizational framework and applying new technology (Glykas and Valiris 1999). |
| Incremental improvement                                                                            | The aim is to make some small changes to an existing process by typically eliminating non-value added activities (Glykas and Valiris 1999).               |

**Table D.4:** Aim related definitions.

| Method option                                                                                                                                                         | Definition                                                                                                                                                |
|-----------------------------------------------------------------------------------------------------------------------------------------------------------------------|-----------------------------------------------------------------------------------------------------------------------------------------------------------|
| <i>Daily involved</i> (involved in either executing tasks within the process under study or managing the process)                                                     |                                                                                                                                                           |
| Process actor                                                                                                                                                         | Actor who is involved in executing tasks within the process.                                                                                              |
| Management                                                                                                                                                            | Actor who is involved in managing the process.                                                                                                            |
| <i>Advising</i> (not being responsible for the process under study, but able to contribute to the development of process alternatives due to expertise or experience) |                                                                                                                                                           |
| BPR specialist                                                                                                                                                        | Supporting staff specialist who has specific expertise in redesigning business processes.                                                                 |
| Finance specialist                                                                                                                                                    | Supporting staff specialist who is knowledgeable about financial issues.                                                                                  |
| HR specialist                                                                                                                                                         | Supporting staff specialist who is knowledgeable about human resource management.                                                                         |
| IS specialist                                                                                                                                                         | Supporting staff specialist who has specific expertise in designing information systems.                                                                  |
| Marketing specialist                                                                                                                                                  | Supporting staff specialist who has specific expertise in communicating the value of a product or service to customers.                                   |
| Customer                                                                                                                                                              | Recipient of the products or services that are provided by the process.                                                                                   |
| Supplier                                                                                                                                                              | Actor who supplies goods or services that are used by the process.                                                                                        |
| External consultant                                                                                                                                                   | Actor who is employed externally (not a member of the firms where the process actors are employed) and provides professional advice on a temporary basis. |
| Peer                                                                                                                                                                  | Actor who is employed internally or externally and is actively involved in a non-competing similar process.                                               |

**Table D.5:** Actors related definitions.

| Method option                                                                                        | Definition                                                                                                                                                                                                                                                                    |
|------------------------------------------------------------------------------------------------------|-------------------------------------------------------------------------------------------------------------------------------------------------------------------------------------------------------------------------------------------------------------------------------|
| <b>Redesign requirements (delineating the redesign objectives that need to be achieved)</b>          |                                                                                                                                                                                                                                                                               |
| Process output goals                                                                                 | Desired end results of the redesign project in terms of process performance dimensions, e.g. the average access time of coronary artery bypass patients needs to be reduced with 60%.                                                                                         |
| Stakeholder / customer needs                                                                         | Requirements that need to be fulfilled by the process according to customers or other process stakeholders.                                                                                                                                                                   |
| <b>Redesign limitations (outlining the factors that restrict the solution space)</b>                 |                                                                                                                                                                                                                                                                               |
| Constraints                                                                                          | Restrictions that delineate the kind of process alternatives that are not going to be considered.                                                                                                                                                                             |
| Risks                                                                                                | Factors that challenge the redesign of the process and might restrict the kind of process alternatives that are going to be considered (Limam Mansar et al. 2009).                                                                                                            |
| <b>AS-IS process specification (providing a description of the current process)</b>                  |                                                                                                                                                                                                                                                                               |
| Textual process description                                                                          | Textual description of the AS-IS process.                                                                                                                                                                                                                                     |
| Process model                                                                                        | Model that provides a graphical representation of the AS-IS process (Kettinger et al. 1997).                                                                                                                                                                                  |
| Simulation model                                                                                     | Model that allows for the dynamic modelling of the AS-IS process (Kettinger et al. 1997).                                                                                                                                                                                     |
| <b>Process weaknesses (identifying redesign priorities)</b>                                          |                                                                                                                                                                                                                                                                               |
| Process output measures                                                                              | Measures that are related to the process performance dimensions.                                                                                                                                                                                                              |
| Process measures                                                                                     | Measures that provide a global view on the characteristics of the process, such as the degree of automation or parallelism (Netjes et al. 2009).                                                                                                                              |
| Different opinions regarding AS-IS process specification                                             | Points of disagreement about how the AS-IS process works. Typically, these points of disagreement become apparent during process mapping activities (Bitner et al. 2008).                                                                                                     |
| Problem investigation                                                                                | Investigation which offers information regarding problems as perceived by the different process stakeholders.                                                                                                                                                                 |
| Culture scan                                                                                         | Assessment of the shared values and beliefs of process stakeholders (Kettinger et al. 1997).                                                                                                                                                                                  |
| <b>Redesign catalysts (providing inspiration for the creation of effective process alternatives)</b> |                                                                                                                                                                                                                                                                               |
| Medical guidelines / key interventions                                                               | Documents with the aim of guiding decisions and criteria regarding diagnosis, management and treatment in specific areas of healthcare. Typically, they are based on an examination of current evidence in the paradigm of evidence-based management (Vanhaecht et al. 2009). |
| Previous solutions                                                                                   | Solutions that have been suggested for problems that are related to the problems associated with the process under study (Chai et al. 2005; Lin and Su 2007; Su et al. 2008).                                                                                                 |
| Benchmark process insights                                                                           | Insights gained from comparing one's process with a similar process (Rohleder and Silver 1997; Talib and Rahman 2010).                                                                                                                                                        |
| Benchmark process models                                                                             | Process models of a similar process (Bitner et al. 2008).                                                                                                                                                                                                                     |
| Technology developments                                                                              | Insights gained from technology observing research (Hsiao and Yang 2010).                                                                                                                                                                                                     |
| Industry value net                                                                                   | Overview of suitable partners with which the process under study could be integrated (Hsiao and Yang 2010).                                                                                                                                                                   |

**Table D.6:** Input related definitions.

| Method option                                                                        | Definition                                                                                                                                                                                                                                                                                                                                   |
|--------------------------------------------------------------------------------------|----------------------------------------------------------------------------------------------------------------------------------------------------------------------------------------------------------------------------------------------------------------------------------------------------------------------------------------------|
| <b>TO-BE specifications (providing descriptions of process improvement ideas)</b>    |                                                                                                                                                                                                                                                                                                                                              |
| TO-BE service concepts                                                               | Concepts that provide a description of the benefits that the process is expected to offer to the customers and determine the value proposition in the broader context of the value network within which it is embedded. As such, TO-BE service concepts are able to guide the design of TO-BE process specifications (Patrício et al. 2011). |
| Summary redesign proposals                                                           | Summary that provides a brief description of redesign proposals, i.e. changes with regard to the AS-IS process that are worth further investigation.                                                                                                                                                                                         |
| Textual process descriptions                                                         | Textual descriptions of TO-BE processes.                                                                                                                                                                                                                                                                                                     |
| Process models                                                                       | Models that provide graphical representations of TO-BE processes (Kettinger et al. 1997).                                                                                                                                                                                                                                                    |
| Simulation models                                                                    | Models that allow for the dynamic modelling of TO-BE processes and support practitioners in validating and evaluating process alternatives (Kettinger et al. 1997).                                                                                                                                                                          |
| TO-BE exception handlers                                                             | Handlers that describe ways to anticipate, avoid, detect and resolve process exceptions (Klein and Dellarcas 2003).                                                                                                                                                                                                                          |
| <b>TO-BE assessments (including preliminary evaluations of process alternatives)</b> |                                                                                                                                                                                                                                                                                                                                              |
| Impact analyses                                                                      | Analyses that provide insights into the potential performance improvement impact and feasibility of process alternatives (Jansen-Vullers and Reijers 2005).                                                                                                                                                                                  |
| Force-field-analyses                                                                 | Analyses that provide insights into the forces that either drive or restrain the implementation of process alternatives (Corbitt and Wright 1997; Corbitt et al. 2000; Kettinger et al. 1997).                                                                                                                                               |

**Table D.7:** Output related definitions.

| Method option                                                                                                                                                                                                                                                     | Definition                                                                                                                                                                                                                                                                                                                                                                                                                                                                                                                                                                                                                                                                                                                                                                                                                                                                       |
|-------------------------------------------------------------------------------------------------------------------------------------------------------------------------------------------------------------------------------------------------------------------|----------------------------------------------------------------------------------------------------------------------------------------------------------------------------------------------------------------------------------------------------------------------------------------------------------------------------------------------------------------------------------------------------------------------------------------------------------------------------------------------------------------------------------------------------------------------------------------------------------------------------------------------------------------------------------------------------------------------------------------------------------------------------------------------------------------------------------------------------------------------------------|
| <i>Unstructured</i> (not containing a detailed procedure that specifies how to get from current process insights (as-is) to concrete improvement ideas (to-be), and not providing guidance regarding the kind of process alternatives that need to be considered) |                                                                                                                                                                                                                                                                                                                                                                                                                                                                                                                                                                                                                                                                                                                                                                                                                                                                                  |
| Brainstorming                                                                                                                                                                                                                                                     | Creativity technique that provides room for spontaneous generation of ideas by redesign participants, where creative thinking is stimulated through a process of adding on the other's concepts (Dennis et al. 2003; Kettinger et al. 1997).                                                                                                                                                                                                                                                                                                                                                                                                                                                                                                                                                                                                                                     |
| Out-of-the-box thinking                                                                                                                                                                                                                                           | Creativity technique that stimulates redesign participants to stretch redesign goals and reconsider assumptions underlying current process execution (Dennis et al. 2003; Kettinger et al. 1997).                                                                                                                                                                                                                                                                                                                                                                                                                                                                                                                                                                                                                                                                                |
| Visioning                                                                                                                                                                                                                                                         | Creativity technique that encourages redesign participants to develop images of possible future processes by identifying and progressively breaking sacred cow assumptions or unsubstantiated constraints (Dennis et al. 2003; Kettinger et al. 1997).                                                                                                                                                                                                                                                                                                                                                                                                                                                                                                                                                                                                                           |
| <i>Semi-structured</i> (offering a work procedure that specifies how to get from current process insights (as-is) to concrete improvement ideas (to-be), but lacking any guidance regarding the kind of process alternatives that need to be considered)          |                                                                                                                                                                                                                                                                                                                                                                                                                                                                                                                                                                                                                                                                                                                                                                                                                                                                                  |
| Delphi                                                                                                                                                                                                                                                            | Technique that distributes a sequence of anonymous questionnaires to redesign participants to successively refine their opinions and finally reach consensus (Kettinger et al. 1997).                                                                                                                                                                                                                                                                                                                                                                                                                                                                                                                                                                                                                                                                                            |
| Nominal group                                                                                                                                                                                                                                                     | Technique that offers a procedure for reaching group consensus through anonymous idea generation by individual redesign participants, followed by discussion and voting (Kettinger et al. 1997).                                                                                                                                                                                                                                                                                                                                                                                                                                                                                                                                                                                                                                                                                 |
| Multi-level design                                                                                                                                                                                                                                                | Technique that starts with designing the to-be situation at a relatively high level of abstraction, i.e. the to-be service concept. After completion, two lower levels of abstraction, which together specify the to-be process, are successively considered (Patrício et al. 2011).                                                                                                                                                                                                                                                                                                                                                                                                                                                                                                                                                                                             |
| Grammar-based                                                                                                                                                                                                                                                     | Technique that captures the grammar underlying a business process and makes use of lexicon and rewrite rules to systematically explore process alternatives (Lee et al. 2008; Lee and Pentland 2000).                                                                                                                                                                                                                                                                                                                                                                                                                                                                                                                                                                                                                                                                            |
| <i>Structured</i> (offering a work procedure that specifies how to get from current process insights (as-is) to concrete improvement ideas (to-be), and including guidance regarding the kind of process alternatives that need to be considered)                 |                                                                                                                                                                                                                                                                                                                                                                                                                                                                                                                                                                                                                                                                                                                                                                                                                                                                                  |
| Rule-based                                                                                                                                                                                                                                                        | Technique that makes use of generic process redesign rules that have accumulated in literature or practice to develop process alternatives (Chai et al. 2005; Nissen 2000; Reijers and Limam Mansar 2005). The premise of these techniques is that specific process problems can be translated to generic process problems, for which generic process redesign rules can offer generic process solutions (Jansen-Vullers and Reijers 2005; Lin and Su 2007; Nissen 2000). An example of a generic process redesign rule is the parallelism rule, which states that redesign participants should consider executing tasks in parallel instead of executing them sequentially (Reijers and Limam Mansar 2005). As a final step, the generic process solutions have to be translated to specific process solutions (Jansen-Vullers and Reijers 2005; Lin and Su 2007; Nissen 2000). |
| Case-based                                                                                                                                                                                                                                                        | Technique that enables an efficient identification of earlier business process redesign projects. These projects offer guidance regarding the process alternatives that have to be considered (Limam Mansar et al. 2003). These techniques make use of libraries of well-document previous business process redesign projects (Limam Mansar et al. 2009; Limam Mansar et al. 2003; Nissen 2000).                                                                                                                                                                                                                                                                                                                                                                                                                                                                                 |
| Repository-based                                                                                                                                                                                                                                                  | Technique that makes use of the notions of process specializations, coordination mechanisms and process exception handlers to systematically generate process alternatives on the basis of an identified list of core activities of the process under study and a repository (Bernstein et al. 1999; Klein and Petti 2006; Malone et al. 1999; Margherita et al. 2007). The repository that is used as a basis includes and organizes numerous specifications of existing processes (Bernstein et al. 1999; Klein and Petti 2006; Malone et al. 1999; Margherita et al. 2007).                                                                                                                                                                                                                                                                                                   |

**Table D.8:** Technique related definitions.

| Method option | Definition                                                                                                                                                                                                                                                              |
|---------------|-------------------------------------------------------------------------------------------------------------------------------------------------------------------------------------------------------------------------------------------------------------------------|
| Communication | Functionality that enables large groups to communicate face-to-face or distributed in a computer-mediated electronic environment. Typically, this environment allows for parallel and anonymous input (Albano et al. 2001; Corbitt et al. 2000; Piirainen et al. 2009). |
| Voting        | Functionality that allows participants to rate different process alternatives (Corbitt and Wright 1997; Mouro et al. 1999).                                                                                                                                             |
| Modeling      | Functionality that supports practitioners in creating graphical representations of process alternatives (Albano et al. 2001; Netjes et al. 2010; Thong et al. 2003).                                                                                                    |
| Simulation    | Functionality that allows dynamic modelling of business processes and supports practitioners in validating and evaluating process alternatives (Kettinger et al. 1997; Nissen 2000).                                                                                    |
| Repository    | Functionality that provides support for the storage and retrieval of descriptions of process alternatives and related discussions (Albano et al. 2001; Mouro et al. 1999; Valiris and Glykas 1999).                                                                     |
| Specific      | Functionality that provides support for a specific technique and does not provide general-purpose functionality.                                                                                                                                                        |

**Table D.9:** Tool related definitions.

## 4. References

- Albano F, Pino JA, Borges MRS (2001) Participatory business process reengineering design: generating solutions. In: SCCC 2001. IEEE Proceedings of the 21th International Conference of the Chilean Computer Science Society, Punta Arenas, 7-9 November 2001
- Bernstein A, Klein M, Malone TW (1999) The process recombinator: a tool for generating new business process ideas. In: De P, DeGross JI (eds) ICIS'99. Proceedings of the 20th International Conference on Information Systems, 12-15 December 1999. Association for Information Systems, Atlanta (GA), p 178
- Bitner MJ, Ostrom AL, Morgan FN (2008) Service blueprinting: a practical technique for service innovation. *Calif Manage Rev* 50(3):66-94
- Chai KH, Zhang J, Tan KC (2005) A TRIZ-based method for new service design. *J Serv Res* 8(1):48-66
- Corbitt G, Wright L (1997) Enhancing business process redesign: using tools to condense the process. In: HICSS'97: IEEE Proceedings of the 30th Hawaii International Conference on System Sciences, Wailea, 7-10 January 1997
- Corbitt GF, Christopolus M, Wright L (2000) New approaches to business process redesign: a case study of collaborative group technology and service mapping. *Group Decis Negot* 9:97-107
- Dennis AR, Carte TA, Kelly GG (2003) Breaking the rules: success and failure in groupware-supported business process reengineering. *Dec Support Syst* 36:31-47
- Glykas M, Valiris G (1999) ARMA: a multi-disciplinary approach to BPR. *Knowl Process Manage* 6(4):213-226
- Hsiao SL, Yang HL (2010) A Service Experience Engineering (SEE) method for developing new services. *Int J Manage* 27(3):437-447
- Jansen-Vullers MH, Kleingeld PAM, Netjes M (2008) Quantifying the performance of workflows. *Inform Syst Manage* 25(4):332-343
- Jansen-Vullers MH, Reijers HA (2005) Business process redesign in healthcare: towards a structured approach. *INFOR* 43(4):321-339
- Kettinger WJ, Teng JTC, Guha S (1997) Business process change: a study of methodologies, techniques, and tools. *MIS Q* 21(1):55-80
- Klein M, Dellarocas C (2003) Designing robust business processes. In: Malone TW, Crowston K, Herman GA (eds) *Organizing business knowledge: The MIT process handbook*. MIT Press Cambridge (MA), p 423-439
- Klein M, Petti C (2006) A handbook-based methodology for redesigning business processes. *Knowl Process Manage* 13(2):108-119
- Lee J, Pentland BT (2000) Grammatical approach to organizational design. MIT Center for Coordination Science Technical Report No. 215. MIT Sloan School of Management, Cambridge (MA)

- Lee J, Wyner GM, Pentland BT (2008) Process grammar as a tool for business process design. *MIS Q* 32(4):757-778
- Limam Mansar S, Marir F, Reijers HA (2003) Case-based reasoning as a technique for knowledge management in business process redesign. *Electron J Knowl Manage* 1(2):113-124
- Limam Mansar S, Reijers HA, Ounnar F (2009) Development of a decision-making strategy to improve the efficiency of BPR. *Expert Syst Appl* 36:3248-3262
- Lin CS, Su CT (2007) An innovative way to create new services: applying the TRIZ methodology. *J Chin Inst Ind Eng* 24(2):142-152
- Malone TW, Crowston K, Lee J, Pentland B, Dellarocas C, Wyner G, Quimby J, Osborn CS, Bernstein A, Herman G, others (1999) Tools for inventing organizations: toward a handbook of organizational processes. *Manage Sci* 45(3):425-443
- Margherita A, Klein M, Elia G (2007) Metrics-based process redesign with the MIT Process Handbook. *Knowl Process Manage* 14(1):46-57
- Mouro EZ, Borges MRS, Garcez CR (1999) A groupware tool to support participatory business process reengineering. In: *IEEE Proceedings of the 5th International Workshop on Groupware*, Cancún, 22-24 September 1999
- Netjes M, Limam Mansar S, Reijers HA, Van der Aalst WMP (2009) Performing business process redesign with best practices: an evolutionary approach. In: Filipe J, Cordeiro J, Cardoso J (eds) *ICEIS 2007. Proceedings of the 9th International Conference on Enterprise Information Systems*, Funchal, 12-16 June 2007. *Lecture Notes in Business Information Processing*. Springer-Verlag, Berlin, p 199
- Netjes M, Reijers HA, Van der Aalst WMP (2010) The PrICE tool kit: tool support for process improvement. In: La Rosa M (eds) *BPM 2010 demonstration track. Proceedings of the 8th International Conference on Business Process Management*, Hoboken, 14-16 September 2010
- Nissen ME (2000) An intelligent tool for process redesign: manufacturing supply-chain applications. *Int J Flex Manuf Syst* 12(4):321-339
- Patrício L, Fisk RP, E Cunha JF, Constantine L (2011) Multilevel service design: from customer value constellation to service experience blueprinting. *J Serv Res* 14(2):180-200
- Piirainen K, Elfvengren K, Korpela J, Tuominen M (2009) Improving the effectiveness of business process development through collaboration engineering: a method for process elicitation. In: *HICSS'09. IEEE Proceedings of the 42nd Hawaii International Conference on System Sciences*, Big Island, 5-8 January 2009
- Reijers HA, Limam Mansar S (2005) Best practices in business process redesign: an overview and qualitative evaluation of successful redesign heuristics. *Omega* 33:283-306
- Rohleder TR, Silver EA (1997) A tutorial on business process improvement. *J Oper Manag* 15:139-154
- Su CT, Lin CS, Chiang TL (2008) Systematic improvement in service quality through TRIZ methodology: an exploratory study. *Total Qual Manag Bus* 19(3):223-243

Talib F, Rahman Z (2010) Critical success factors of TQM in service organizations: a proposed model. *Serv Mark Q* 31(3):363-380

Thong JYL, Yap CS, Seah KL (2003) A consolidated methodology for business process reengineering. *Int J Comp Appl Technol* 17(1):1-15

Valiris G, Glykas M (1999) Critical review of existing BPR methodologies: the need for a holistic approach. *Bus Process Manag J* 5(1):65-86

Vanhaecht K, Panella M, Van Zelm R, Sermeus W (2009) Is there a future for pathways? Five pieces of the puzzle. *Int J Care Path* 13:82-86

## Appendix E: Method Element Codings per Study

| P | ID   | Title                                                                                                           | Source name                                                  | Authors                              | Year | Method.Aim<br>(developed method)                            | Method.Aim<br>(reviewed method)                | Method.Actors<br>(developed method)                                 | Method.Actors<br>(reviewed method)                 |
|---|------|-----------------------------------------------------------------------------------------------------------------|--------------------------------------------------------------|--------------------------------------|------|-------------------------------------------------------------|------------------------------------------------|---------------------------------------------------------------------|----------------------------------------------------|
| 1 | 642  | Business process redesign in healthcare: towards a structured approach                                          | INFOR                                                        | MH Jansen-Vullers;<br>HA Reijers     | 2005 | Costs<br>Time<br>Quality<br>External quality<br>Flexibility |                                                | Process actor<br>Management<br>IS specialist<br>External consultant | Process actor<br>Management<br>External consultant |
| 1 | 664  | A TRIZ-based method for new service design                                                                      | Journal of Service Research                                  | K-H Chai; J Zhang;<br>K-C Tan        | 2005 |                                                             |                                                |                                                                     |                                                    |
| 1 | 865  | A consolidated methodology for business process reengineering                                                   | International Journal of Computer Applications in Technology | JYL Thong; C-S Yap; KL Seah          | 2003 | Costs<br>Time<br>Quality<br>External quality                |                                                | Process actor<br>IS specialist<br>External consultant               |                                                    |
| 1 | 1073 | Visualized guidelines for IT-enabled process change                                                             | Information Resources Management Journal                     | MR Hoogeweegen                       | 2000 | Costs<br>Time<br>External quality<br>Flexibility            | Radical improvement<br>Incremental improvement |                                                                     |                                                    |
| 1 | 1076 | An intelligent tool for process redesign: manufacturing supply-chain applications                               | International Journal of Flexible Manufacturing Systems      | ME Nissen                            | 2000 | Costs<br>Time                                               |                                                | Process actor<br>Management                                         | External consultant                                |
| 1 | 1111 | New approaches to business process redesign: a case study of collaborative group technology and service mapping | Group Decision and Negotiation                               | GF Corbitt; M Christopolus; L Wright | 2000 | Revenue<br>Costs<br>Quality                                 |                                                | Process actor                                                       |                                                    |



|   |      |                                                                                 |                                                |                                         |      |                                                                                                    |                                                                                            |                                                                            |                                              |
|---|------|---------------------------------------------------------------------------------|------------------------------------------------|-----------------------------------------|------|----------------------------------------------------------------------------------------------------|--------------------------------------------------------------------------------------------|----------------------------------------------------------------------------|----------------------------------------------|
| 1 | 1331 | Business process change: a study of methodologies, techniques, and tools        | MIS Quarterly                                  | WJ Kettinger; JTC Teng; S Guha          | 1997 |                                                                                                    | Costs<br>Quality<br>External quality<br><br>Radical improvement<br>Incremental improvement |                                                                            | Process actor<br>Management<br>IS specialist |
| 1 | 1464 | Methodology-driven use of automated support in business process re-engineering  | Journal of Management Information Systems      | AR Dennis; RM Daniels Jr; G Hayes et al | 1994 | Costs<br>Time<br>Quality<br>External quality<br><br>Radical improvement<br>Incremental improvement |                                                                                            | Process actor<br>Management<br>Customer<br>Supplier<br>External consultant |                                              |
| 1 | 1616 | Applying Lean Six Sigma and TRIZ methodology in banking services                | Total Quality Management & Business Excellence | F-K Wang; K-S Chen                      | 2010 | Costs<br>Time<br>Quality<br>External quality                                                       |                                                                                            |                                                                            |                                              |
| 1 | 1768 | ARMA: a multi-disciplinary approach to BPR                                      | Knowledge and Process Management               | M Glykas; G Valiris                     | 1999 | Radical improvement<br>Incremental improvement                                                     |                                                                                            | Process actor                                                              |                                              |
| 1 | 1771 | Critical review of existing BPR methodologies: the need for a holistic approach | Business Process Management Journal            | G Valiris; M Glykas                     | 1999 | Radical improvement<br>Incremental improvement                                                     | Costs<br>Time<br>External quality                                                          |                                                                            | Process actor<br>Management                  |
| 1 | 1774 | Process reverse engineering for BPR: a form-based approach                      | Information & Management                       | K-H Kim; Y-G Kim                        | 1998 | Time<br>External quality                                                                           |                                                                                            |                                                                            |                                              |
| 1 | 1819 | Metrics-based process redesign with the MIT process handbook                    | Knowledge and Process Management               | A Margherita; M Klein; G Elia           | 2007 | Costs<br>Time<br>External quality<br>Internal quality<br>Flexibility                               |                                                                                            |                                                                            |                                              |

|   |      |                                                                                                 |                                                          |                                       |      |                                      |  |                                                                      |  |
|---|------|-------------------------------------------------------------------------------------------------|----------------------------------------------------------|---------------------------------------|------|--------------------------------------|--|----------------------------------------------------------------------|--|
| 1 | 1973 | A structured evaluation of business process improvement approaches                              | Business Process Management Journal                      | G Zellner                             | 2011 |                                      |  |                                                                      |  |
| 1 | 1989 | A Service Experience Engineering (SEE) method for developing new services                       | International Journal of Management                      | S-L Hsiao; H-L Yang                   | 2010 | Revenue<br>Costs<br>External quality |  |                                                                      |  |
| 1 | 2085 | A handbook-based methodology for redesigning business processes                                 | Knowledge and Process Management                         | M Klein; C Petti                      | 2006 |                                      |  | Process actor<br>BPR specialist                                      |  |
| 1 | 2089 | Service blueprinting: a practical technique for service innovation                              | California Management Review                             | MJ Bitner; AL Ostrom; FN Morgan       | 2008 | External quality                     |  | Process actor<br>Management<br>BPR specialist<br>Customer            |  |
| 1 | 2149 | Multilevel service design: From customer value constellation to service experience blueprinting | Journal of Service Research                              | L Patrício; RP Fisk; JF e Cunha et al | 2011 |                                      |  | Process actor<br>Management<br>IS specialist<br>Marketing specialist |  |
| 1 | 2225 | Systematic improvement in service quality through TRIZ methodology: an exploratory study        | Total Quality Management & Business Excellence           | C-T Su; C-S Lin; T-L Chiang           | 2008 | External quality                     |  |                                                                      |  |
| 1 | 2428 | PAWS: towards a participatory approach to business process reengineering                        | International Workshop on Groupware                      | MRS Borges; JA Pino                   | 1999 |                                      |  | Process actor<br>Management<br>External consultant                   |  |
| 1 | 2530 | An innovative way to create new services: applying the TRIZ methodology                         | Journal of the Chinese Institute of Industrial Engineers | C-S Lin; C-T Su                       | 2007 | Costs<br>Time                        |  | Management                                                           |  |

|   |      |                                                                                                                                 |                                                                                    |                                            |      |                                         |  |                                                                      |                                                    |
|---|------|---------------------------------------------------------------------------------------------------------------------------------|------------------------------------------------------------------------------------|--------------------------------------------|------|-----------------------------------------|--|----------------------------------------------------------------------|----------------------------------------------------|
| 1 | 2560 | Enhancing business process redesign: using tools to condense the process                                                        | Hawaii International Conference on System Sciences                                 | G Corbitt; L Wright                        | 1997 | External quality                        |  | Process actor                                                        |                                                    |
| 1 | 3136 | Tools for inventing organizations: toward a handbook of organizational processes                                                | Management Science                                                                 | TW Malone; K Crowston; J Lee et al         | 1999 | Costs<br>Time<br>Internal quality       |  |                                                                      |                                                    |
| 1 | 3137 | Tools for inventing organizations: toward a handbook of organizational processes                                                | Workshop on Enabling Technologies: Infrastructure for Collaborative Enterprises    | TW Malone; K Crowston; J Lee et al         | 1993 | Costs<br>Time<br>External quality       |  | Process actor<br>Management<br>BPR specialist<br>External consultant |                                                    |
| 1 | 3200 | A groupware tool to support participatory business process reengineering                                                        | International Workshop on Groupware                                                | EZ Mouro; MRS Borges; CR Garcez            | 1999 | Costs<br>Quality                        |  | Process actor<br>Management<br>External consultant                   |                                                    |
| 1 | 3227 | Intelligent tools for workflow process redesign: a research agenda                                                              | International Conference on Business Process Management                            | M Netjes; I Vanderfeesten; HA Reijers      | 2006 | Costs<br>Time<br>Quality<br>Flexibility |  |                                                                      | Process actor<br>Management<br>External consultant |
| 1 | 3298 | Improving the effectiveness of business process development through collaboration engineering: a method for process elicitation | Hawaii International Conference on System Sciences                                 | K Piirainen; K Elfvengren; J Korpela et al | 2009 | Revenue<br>Costs<br>External quality    |  | Process actor                                                        |                                                    |
| 1 | 3408 | Process life cycle engineering: a knowledge-based approach and environment                                                      | International Journal of Intelligent Systems in Accounting, Finance and Management | W Scacchi; P Mi                            | 1997 |                                         |  |                                                                      |                                                    |
| 1 | 3440 | A decision-based approach to business process improvement                                                                       | International Conference on Systems, Man and Cybernetics                           | K Shahzad; J Zdravkovic                    | 2010 | Costs<br>Time<br>Quality<br>Flexibility |  |                                                                      |                                                    |

|   |       |                                                                                                               |                                                                  |                                        |      |                                                                                 |                                                                      |                                                                                         |  |
|---|-------|---------------------------------------------------------------------------------------------------------------|------------------------------------------------------------------|----------------------------------------|------|---------------------------------------------------------------------------------|----------------------------------------------------------------------|-----------------------------------------------------------------------------------------|--|
| 1 | 3447  | Workflow reengineering: a methodology for business process reengineering using workflow management technology | Hawaii International Conference on System Sciences               | LTSM Bitzer; MN Kamel                  | 1997 | Revenue<br>Costs<br>Time<br>External quality<br>Internal quality<br>Flexibility |                                                                      | Process actor<br>Finance specialist<br>IS specialist<br>Customer<br>External consultant |  |
| 1 | 3469  | Service/product engineering as a potential approach to value enhancement in supply chains                     | Progress in Industrial Ecology - An International Journal        | A Simboli; A Raggi; L Petti et al.     | 2008 | Costs<br>External quality                                                       |                                                                      |                                                                                         |  |
| 1 | BFT01 | Participatory business process reengineering design: generating solutions                                     | International Conference of the Chilean Computer Science Society | F Albano; JA Pino; MRS Borges          | 2001 |                                                                                 |                                                                      | Process actor<br>Management<br>External consultant                                      |  |
| 1 | BFT02 | The process recombinator: a tool for generating new business process ideas                                    | International Conference on Information Systems                  | A Bernstein; M Klein; TW Malone        | 1999 |                                                                                 |                                                                      |                                                                                         |  |
| 1 | BFT03 | Analysis of techniques for business process improvement                                                       | European Conference on Information Systems                       | P Griesberger; S Leist; G Zellner      | 2011 |                                                                                 | Costs<br>Time<br>External quality<br>Internal quality<br>Flexibility |                                                                                         |  |
| 1 | BFT04 | Selecting the best strategic practices for business process redesign                                          | Business Process Management Journal                              | P Hanafizadeh; M Moosakhani; J Bakhshi | 2009 | Costs<br>Time<br>Quality<br>Flexibility                                         |                                                                      |                                                                                         |  |
| 1 | BFT06 | Grammatical approach to organizational design                                                                 | MIT Center for Coordination Science Technical Report             | J Lee; BT Pentland                     | 2000 |                                                                                 |                                                                      |                                                                                         |  |

|   |       |                                                                                                                       |                                                            |                                            |      |                                                                                                        |  |                                                  |                     |
|---|-------|-----------------------------------------------------------------------------------------------------------------------|------------------------------------------------------------|--------------------------------------------|------|--------------------------------------------------------------------------------------------------------|--|--------------------------------------------------|---------------------|
| 1 | BFT07 | Case-based reasoning as a technique for knowledge management in business process redesign                             | Electronic Journal on Knowledge Management                 | S Limam Mansar; F Marir; HA Reijers        | 2003 | Costs<br>Time<br>Quality<br>Flexibility                                                                |  | Management<br>External consultant                |                     |
| 1 | BFT08 | Development of a decision-making strategy to improve the efficiency of BPR                                            | Expert Systems with Applications                           | S Limam Mansar; H A Reijers; F Ounnar      | 2009 | Revenue<br>Costs<br>Time<br>Quality<br>External quality                                                |  |                                                  | External consultant |
| 1 | BFT09 | On the formal generation of process redesigns                                                                         | International Conference on Business Process Management    | M Netjes; HA Reijers; WMP van der Aalst    | 2009 | Costs<br>Time<br>Quality                                                                               |  |                                                  |                     |
| 1 | BFT10 | Performing business process redesign with best practices: an evolutionary approach                                    | International Conference on Enterprise Information Systems | M Netjes; S Limam Mansar; HA Reijers et al | 2009 | Costs<br>Time<br>Quality                                                                               |  |                                                  |                     |
| 1 | BFT11 | Best practices in business process redesign: an overview and qualitative evaluation of successful redesign heuristics | Omega                                                      | HA Reijers; S Limam Mansar                 | 2005 | Costs<br>Time<br>Quality<br>Flexibility                                                                |  |                                                  |                     |
| 1 | BFT12 | A tutorial on business process improvement                                                                            | Journal of Operations Management                           | TR Rohleder; EA Silver                     | 1997 | Costs<br>Time<br>External quality<br>Flexibility<br><br>Radical improvement<br>Incremental improvement |  | Process actor<br>Customer<br>External consultant |                     |
| 1 | BFT13 | Towards a goal-driven approach for business process improvement using process-oriented data warehouse                 | International Conference on Business Information Systems   | K Shahzad; C Giannoulis                    | 2011 | Costs<br>Time<br>Quality<br>Flexibility                                                                |  |                                                  |                     |

|   |       |                                                                                                                                  |                                                                               |                                                    |      |                                                         |                                                                  |                                 |                                                                                                  |
|---|-------|----------------------------------------------------------------------------------------------------------------------------------|-------------------------------------------------------------------------------|----------------------------------------------------|------|---------------------------------------------------------|------------------------------------------------------------------|---------------------------------|--------------------------------------------------------------------------------------------------|
| 1 | BFT18 | Designing robust business processes                                                                                              | Organizing business knowledge: The MIT process handbook                       | M Klein; C Dellarocas                              | 2003 |                                                         |                                                                  |                                 |                                                                                                  |
| 1 | BFT19 | Process grammar as a tool for business process design                                                                            | MIS Quarterly                                                                 | J Lee; GM Wyner; BT Pentland                       | 2008 |                                                         |                                                                  |                                 |                                                                                                  |
| 1 | BFT20 | The PRICE Tool Kit: tool support for process improvement                                                                         | International Conference on Business Process Management                       | M Netjes; HA Reijers; WMP van der Aalst            | 2010 |                                                         |                                                                  |                                 | Process actor<br>External consultant                                                             |
| 1 | BFT21 | Development of a hybrid model to improve the efficiency of business process reengineering                                        | International Conference on Industrial Engineering and Engineering Management | W-H Tsai; C-C Yang; H-C Kuo                        | 2009 | Revenue<br>Costs<br>Time<br>Quality<br>External quality |                                                                  | Process actor<br>Management     |                                                                                                  |
| 1 | AC4   | Model-based support for business re-engineering                                                                                  | Information and Software Technology                                           | S Jarzabek; TW Ling                                | 1996 | Costs<br>Time<br>External quality<br>Flexibility        |                                                                  | Process actor<br>BPR specialist |                                                                                                  |
| 2 | 176   | Empirically testing determinants of hospital BPR success                                                                         | International Journal of Health Care Quality Assurance                        | M Do Carmo Caccia-Bava; VCK Guimaraes; T Guimaraes | 2005 |                                                         | Revenue<br>Costs<br>Time<br>External quality<br>Internal quality |                                 | Process actor                                                                                    |
| 2 | 627   | An examination of the role of organizational enablers in business process reengineering and the impact of information technology | Information Resources Management Journal                                      | HR Ahadi                                           | 2004 |                                                         | Revenue<br>Costs<br>Time<br>External quality<br>Internal quality |                                 | Process actor<br>Management<br>HR specialist<br>IS specialist<br>Customer<br>External consultant |

|   |      |                                                                                               |                                                                    |                                      |      |  |                                                                                                                                       |  |                                                                                                                                                   |
|---|------|-----------------------------------------------------------------------------------------------|--------------------------------------------------------------------|--------------------------------------|------|--|---------------------------------------------------------------------------------------------------------------------------------------|--|---------------------------------------------------------------------------------------------------------------------------------------------------|
| 2 | 834  | Business process change and organizational performance: exploring an antecedent model         | Journal of Management Information Systems                          | S Guha; V Grover; WJ Kettinger et al | 1997 |  | Revenue<br>Costs<br>Time<br>External quality<br>Internal quality<br>Flexibility<br><br>Radical improvement<br>Incremental improvement |  | Process actor<br>Management<br>External consultant                                                                                                |
| 2 | 836  | Empirically testing the antecedents of BPR success                                            | International Journal of Production Economics                      | T Guimaraes                          | 1997 |  | Revenue<br>Costs<br>Time<br>External quality<br>Internal quality                                                                      |  | External consultant                                                                                                                               |
| 2 | 870  | Critical factors for the effectiveness of clinical pathway in improving care outcomes         | International Conference on Service Systems and Service Management | J Shi; Q Su; Z Zhao                  | 2008 |  | Costs<br>Time<br>External quality                                                                                                     |  | Process actor                                                                                                                                     |
| 2 | 1286 | Critical success factors of TQM in service organizations: a proposed model                    | Services Marketing Quarterly                                       | F Talib; Z Rahman                    | 2010 |  | Revenue<br>Costs<br>Time<br>Quality<br>External quality                                                                               |  | Process actor<br>Supplier                                                                                                                         |
| 2 | 1661 | The state of business process reengineering: a search for success factors                     | Total Quality Management & Business Excellence                     | D Paper; R-D Chang                   | 2005 |  |                                                                                                                                       |  | Process actor                                                                                                                                     |
| 2 | 1672 | Breaking the rules: success and failure in groupware-supported business process reengineering | Decision Support Systems                                           | AR Dennis; TA Carte; GG Kelly        | 2003 |  | Costs<br>Time<br>Quality<br>External quality<br><br>Radical improvement<br>Incremental improvement                                    |  | Process actor<br>Management<br>Finance specialist<br>IS specialist<br>Marketing specialist<br>Customer<br>Supplier<br>External consultant<br>Peer |

|   |      |                                                                                                                       |                                                             |                                          |      |  |                                                                                                             |  |                                                                                                               |
|---|------|-----------------------------------------------------------------------------------------------------------------------|-------------------------------------------------------------|------------------------------------------|------|--|-------------------------------------------------------------------------------------------------------------|--|---------------------------------------------------------------------------------------------------------------|
| 2 | 2059 | Is there a future for pathways? Five pieces of the puzzle                                                             | International Journal of Care Pathways                      | K Vanhaecht; M Panella; R van Zelm et al | 2009 |  | Costs<br>Quality<br>Internal quality                                                                        |  | Process actor<br>Management<br>Patient                                                                        |
| 2 | BFT3 | Collaborative business engineering: a decade of lessons from the field                                                | Journal of Management Information Systems                   | M Hengst; GJ de Vreede                   | 2004 |  | Costs<br>Time<br>External quality<br>Internal quality<br><br>Radical improvement<br>Incremental improvement |  | Management<br>IS specialist<br>Customer<br>Supplier<br>External consultant                                    |
| 2 | BFT7 | Prevalence and use of clinical pathways in 23 countries - an international survey by the European Pathway Association | International Journal of Care Pathways                      | K Vanhaecht; M Bollmann; K Bower et al   | 2006 |  | Costs<br>Time<br>External quality<br>Internal quality                                                       |  | Process actor<br>Management<br>Patient<br>Supplier                                                            |
| 2 | AC2  | The implementation of business process reengineering                                                                  | Journal of Management Information Systems                   | V Grover; SR Jeong; WJ Kettinger et al   | 1995 |  | Revenue<br>Costs<br>Time<br>External quality                                                                |  | IS specialist<br>Customer<br>External consultant                                                              |
| 2 | AC7  | Business process reengineering: application and success - an Australian study                                         | International Journal of Operations & Production Management | P O'Neill; AS Sohal                      | 1998 |  | Revenue<br>Costs<br>Time<br>Quality<br>External quality                                                     |  | Process actor<br>Management<br>BPR specialist<br>IS specialist<br>Customer<br>Supplier<br>External consultant |

**Table E.1:** Method element codings per study (Method.Aim, Method.Actors). P = Part.



| P | ID   | Title                                                                                                           | Source name                                                  | Authors                              | Year | Method.Input<br>(developed method)                                                                                                     | Method.Input<br>(reviewed method) | Method.Output<br>(developed method)                                                                  | Method.Output<br>(reviewed method) |
|---|------|-----------------------------------------------------------------------------------------------------------------|--------------------------------------------------------------|--------------------------------------|------|----------------------------------------------------------------------------------------------------------------------------------------|-----------------------------------|------------------------------------------------------------------------------------------------------|------------------------------------|
| 1 | 642  | Business process redesign in healthcare: towards a structured approach                                          | INFOR                                                        | MH Jansen-Vullers;<br>HA Reijers     | 2005 | Process output goals<br>Risks<br>Process model<br>Simulation model                                                                     | Process model                     | Summary redesign proposals<br>Process models<br>Simulation models<br>Impact analyses                 |                                    |
| 1 | 664  | A TRIZ-based method for new service design                                                                      | Journal of Service Research                                  | K-H Chai; J Zhang;<br>K-C Tan        | 2005 | Process output goals<br>Customer needs<br>Constraints<br>Problem investigation<br>Previous solutions                                   |                                   | Summary redesign proposals                                                                           |                                    |
| 1 | 865  | A consolidated methodology for business process reengineering                                                   | International Journal of Computer Applications in Technology | JYL Thong; C-S Yap; KL Seah          | 2003 | Process output goals<br>Customer needs<br>Process model<br>Process output measures<br>Problem investigation<br>Technology developments |                                   | Summary redesign proposals<br>Process models<br>Simulation models<br>Impact analyses                 |                                    |
| 1 | 1073 | Visualized guidelines for IT-enabled process change                                                             | Information Resources Management Journal                     | MR Hoogeweegen                       | 2000 | Process model                                                                                                                          | Process output goals              | Process models                                                                                       |                                    |
| 1 | 1076 | An intelligent tool for process redesign: manufacturing supply-chain applications                               | International Journal of Flexible Manufacturing Systems      | ME Nissen                            | 2000 | Process model<br>Process measures                                                                                                      |                                   | Summary redesign proposals<br>Simulation models<br>Impact analyses                                   |                                    |
| 1 | 1111 | New approaches to business process redesign: a case study of collaborative group technology and service mapping | Group Decision and Negotiation                               | GF Corbitt; M Christopolus; L Wright | 2000 | Customer needs<br>Process model<br>Problem investigation                                                                               |                                   | Summary redesign proposals<br>Textual process descriptions<br>Process models<br>Force-field-analyses |                                    |

|   |      |                                                                                 |                                                |                                         |      |                                                                                           |                                                                                                                                                        |                                                                             |                                                             |
|---|------|---------------------------------------------------------------------------------|------------------------------------------------|-----------------------------------------|------|-------------------------------------------------------------------------------------------|--------------------------------------------------------------------------------------------------------------------------------------------------------|-----------------------------------------------------------------------------|-------------------------------------------------------------|
| 1 | 1331 | Business process change: a study of methodologies, techniques, and tools        | MIS Quarterly                                  | WJ Kettinger; JTC Teng; S Guha          | 1997 |                                                                                           | Process output goals<br>Customer needs<br>Process model<br>Process output measures<br>Problem investigation<br>Culture scan<br>Technology developments |                                                                             | Process models<br>Simulation models<br>Force-field-analyses |
| 1 | 1464 | Methodology-driven use of automated support in business process re-engineering  | Journal of Management Information Systems      | AR Dennis; RM Daniels Jr; G Hayes et al | 1994 | Process output goals<br>Constraints<br>Process model<br>Problem investigation             |                                                                                                                                                        | Summary redesign proposals                                                  |                                                             |
| 1 | 1616 | Applying Lean Six Sigma and TRIZ methodology in banking services                | Total Quality Management & Business Excellence | F-K Wang; K-S Chen                      | 2010 | Process output goals<br>Process model<br>Process output measures<br>Problem investigation |                                                                                                                                                        | Process models                                                              |                                                             |
| 1 | 1768 | ARMA: a multi-disciplinary approach to BPR                                      | Knowledge and Process Management               | M Glykas; G Valiris                     | 1999 | Process output goals<br>Process model<br>Process output measures                          |                                                                                                                                                        | Summary redesign proposals<br>Process models                                |                                                             |
| 1 | 1771 | Critical review of existing BPR methodologies: the need for a holistic approach | Business Process Management Journal            | G Valiris; M Glykas                     | 1999 | Process output goals<br>Process model<br>Process output measures                          | Process output goals<br>Process model<br>Process output measures                                                                                       | Summary redesign proposals<br>Process models                                |                                                             |
| 1 | 1774 | Process reverse engineering for BPR: a form-based approach                      | Information & Management                       | K-H Kim; Y-G Kim                        | 1998 | Process model<br>Process output measures<br>Process measures                              | Process model                                                                                                                                          | Process models                                                              |                                                             |
| 1 | 1819 | Metrics-based process redesign with the MIT process handbook                    | Knowledge and Process Management               | A Margherita; M Klein; G Elia           | 2007 | Textual process description                                                               | Process output goals<br>Process output measures<br>Problem investigation                                                                               | Textual process descriptions<br>TO-BE exception handlers<br>Impact analyses |                                                             |

|   |      |                                                                                                 |                                                          |                                       |      |                                                                                                               |  |                                                                                      |  |
|---|------|-------------------------------------------------------------------------------------------------|----------------------------------------------------------|---------------------------------------|------|---------------------------------------------------------------------------------------------------------------|--|--------------------------------------------------------------------------------------|--|
| 1 | 1973 | A structured evaluation of business process improvement approaches                              | Business Process Management Journal                      | G Zellner                             | 2011 |                                                                                                               |  |                                                                                      |  |
| 1 | 1989 | A Service Experience Engineering (SEE) method for developing new services                       | International Journal of Management                      | S-L Hsiao; H-L Yang                   | 2010 | Customer needs<br>Technology developments<br>Industry value net                                               |  | TO-BE service concepts<br>Process models                                             |  |
| 1 | 2085 | A handbook-based methodology for redesigning business processes                                 | Knowledge and Process Management                         | M Klein; C Petti                      | 2006 | Textual process description                                                                                   |  | Textual process descriptions<br>TO-BE exception handlers                             |  |
| 1 | 2089 | Service blueprinting: a practical technique for service innovation                              | California Management Review                             | MJ Bitner; AL Ostrom; FN Morgan       | 2008 | Process model<br>Different opinions with regard to AS-IS<br>process specification<br>Benchmark process models |  | Summary redesign proposals<br>Process models                                         |  |
| 1 | 2149 | Multilevel service design: From customer value constellation to service experience blueprinting | Journal of Service Research                              | L Patrício; RP Fisk; JF e Cunha et al | 2011 | Customer needs<br>Process model<br>Problem investigation                                                      |  | TO-BE service concepts<br>Process models                                             |  |
| 1 | 2225 | Systematic improvement in service quality through TRIZ methodology: an exploratory study        | Total Quality Management & Business Excellence           | C-T Su; C-S Lin; T-L Chiang           | 2008 | Process output goals<br>Customer needs<br>Problem investigation<br>Previous solutions                         |  | Summary redesign proposals<br>Impact analyses                                        |  |
| 1 | 2428 | PAWS: towards a participatory approach to business process reengineering                        | International Workshop on Groupware                      | MRS Borges; JA Pino                   | 1999 | Process output goals<br>Process model<br>Problem investigation                                                |  | Summary redesign proposals<br>Process models<br>Simulation models<br>Impact analyses |  |
| 1 | 2530 | An innovative way to create new services: applying the TRIZ methodology                         | Journal of the Chinese Institute of Industrial Engineers | C-S Lin; C-T Su                       | 2007 | Process output goals<br>Customer needs<br>Problem investigation<br>Previous solutions                         |  | Summary redesign proposals<br>Impact analyses                                        |  |

|   |      |                                                                                                                                 |                                                                                    |                                            |      |                                                                                                           |  |                                                                      |  |
|---|------|---------------------------------------------------------------------------------------------------------------------------------|------------------------------------------------------------------------------------|--------------------------------------------|------|-----------------------------------------------------------------------------------------------------------|--|----------------------------------------------------------------------|--|
| 1 | 2560 | Enhancing business process redesign: using tools to condense the process                                                        | Hawaii International Conference on System Sciences                                 | G Corbitt; L Wright                        | 1997 | Customer needs<br>Process model<br>Problem investigation                                                  |  | Summary redesign proposals<br>Process models<br>Force-field-analyses |  |
| 1 | 3136 | Tools for inventing organizations: toward a handbook of organizational processes                                                | Management Science                                                                 | TW Malone; K Crowston; J Lee et al         | 1999 |                                                                                                           |  | Textual process descriptions                                         |  |
| 1 | 3137 | Tools for inventing organizations: toward a handbook of organizational processes                                                | Workshop on Enabling Technologies: Infrastructure for Collaborative Enterprises    | TW Malone; K Crowston; J Lee et al         | 1993 | Process output goals<br>Textual process description                                                       |  | Textual process descriptions                                         |  |
| 1 | 3200 | A groupware tool to support participatory business process reengineering                                                        | International Workshop on Groupware                                                | EZ Mouro; MRS Borges; CR Garcez            | 1999 | Process output goals<br>Process model<br>Problem investigation                                            |  | Summary redesign proposals<br>Process models<br>Impact analyses      |  |
| 1 | 3227 | Intelligent tools for workflow process redesign: a research agenda                                                              | International Conference on Business Process Management                            | M Netjes; I Vanderfeesten; HA Reijers      | 2006 | Process output goals<br>Process model                                                                     |  | Process models                                                       |  |
| 1 | 3298 | Improving the effectiveness of business process development through collaboration engineering: a method for process elicitation | Hawaii International Conference on System Sciences                                 | K Piirainen; K Elfvengren; J Korpela et al | 2009 | Process output goals<br>Process model<br>Problem investigation                                            |  | Summary redesign proposals                                           |  |
| 1 | 3408 | Process life cycle engineering: a knowledge-based approach and environment                                                      | International Journal of Intelligent Systems in Accounting, Finance and Management | W Scacchi; P Mi                            | 1997 | Process model<br>Simulation model<br>Process output measures<br>Process measures<br>Problem investigation |  | Process models<br>Simulation models                                  |  |
| 1 | 3440 | A decision-based approach to business process improvement                                                                       | International Conference on Systems, Man and Cybernetics                           | K Shahzad; J Zdravkovic                    | 2010 | Process output goals<br>Process output measures                                                           |  | Summary redesign proposals<br>Impact analyses                        |  |

|   |       |                                                                                                               |                                                                  |                                        |      |                                                                                                                                             |                            |                                                                                      |  |
|---|-------|---------------------------------------------------------------------------------------------------------------|------------------------------------------------------------------|----------------------------------------|------|---------------------------------------------------------------------------------------------------------------------------------------------|----------------------------|--------------------------------------------------------------------------------------|--|
| 1 | 3447  | Workflow reengineering: a methodology for business process reengineering using workflow management technology | Hawaii International Conference on System Sciences               | LTSM Bitzer; MN Kamel                  | 1997 | Process output goals<br>Customer needs<br>Process model<br>Process output measures<br>Benchmark process insights<br>Technology developments |                            | Process models<br>Simulation models<br>Impact analyses                               |  |
| 1 | 3469  | Service/product engineering as a potential approach to value enhancement in supply chains                     | Progress in Industrial Ecology - An International Journal        | A Simboli; A Raggi; L Petti et al.     | 2008 | Customer / stakeholder needs<br>Process output measures                                                                                     |                            | TO-BE service concepts<br>Process models                                             |  |
| 1 | BFT01 | Participatory business process reengineering design: generating solutions                                     | International Conference of the Chilean Computer Science Society | F Albano; JA Pino; MRS Borges          | 2001 | Process output goals<br>Process model<br>Problem investigation                                                                              |                            | Summary redesign proposals<br>Process models<br>Simulation models<br>Impact analyses |  |
| 1 | BFT02 | The process recombinator: a tool for generating new business process ideas                                    | International Conference on Information Systems                  | A Bernstein; M Klein; TW Malone        | 1999 | Textual process description                                                                                                                 |                            | Textual process descriptions<br>Impact analyses                                      |  |
| 1 | BFT03 | Analysis of techniques for business process improvement                                                       | European Conference on Information Systems                       | P Griesberger; S Leist; G Zellner      | 2011 |                                                                                                                                             |                            |                                                                                      |  |
| 1 | BFT04 | Selecting the best strategic practices for business process redesign                                          | Business Process Management Journal                              | P Hanafizadeh; M Moosakhani; J Bakhshi | 2009 | Process output goals<br>Process model<br>Problem investigation                                                                              |                            | Process models                                                                       |  |
| 1 | BFT06 | Grammatical approach to organizational design                                                                 | MIT Center for Coordination Science Technical Report             | J Lee; BT Pentland                     | 2000 | Textual process description                                                                                                                 | Benchmark process insights | Textual process descriptions                                                         |  |

|   |       |                                                                                                                       |                                                            |                                            |      |                                                                                                                         |  |                                                        |  |
|---|-------|-----------------------------------------------------------------------------------------------------------------------|------------------------------------------------------------|--------------------------------------------|------|-------------------------------------------------------------------------------------------------------------------------|--|--------------------------------------------------------|--|
| 1 | BFT07 | Case-based reasoning as a technique for knowledge management in business process redesign                             | Electronic Journal on Knowledge Management                 | S Limam Mansar; F Marir; HA Reijers        | 2003 | Process output goals<br>Textual process description<br>Problem investigation                                            |  | Summary redesign proposals                             |  |
| 1 | BFT08 | Development of a decision-making strategy to improve the efficiency of BPR                                            | Expert Systems with Applications                           | S Limam Mansar; H A Reijers; F Ounnar      | 2009 | Process output goals<br>Risks                                                                                           |  |                                                        |  |
| 1 | BFT09 | On the formal generation of process redesigns                                                                         | International Conference on Business Process Management    | M Netjes; HA Reijers; WMP van der Aalst    | 2009 | Process model<br>Process measures                                                                                       |  | Process models<br>Impact analyses                      |  |
| 1 | BFT10 | Performing business process redesign with best practices: an evolutionary approach                                    | International Conference on Enterprise Information Systems | M Netjes; S Limam Mansar; HA Reijers et al | 2009 | Process model<br>Process measures                                                                                       |  | Process models<br>Simulation models<br>Impact analyses |  |
| 1 | BFT11 | Best practices in business process redesign: an overview and qualitative evaluation of successful redesign heuristics | Omega                                                      | HA Reijers; S Limam Mansar                 | 2005 | Process model                                                                                                           |  |                                                        |  |
| 1 | BFT12 | A tutorial on business process improvement                                                                            | Journal of Operations Management                           | TR Rohleder; EA Silver                     | 1997 | Process output goals<br>Process model<br>Process output measures<br>Problem investigation<br>Benchmark process insights |  | Process models<br>Simulation models<br>Impact analyses |  |
| 1 | BFT13 | Towards a goal-driven approach for business process improvement using process-oriented data warehouse                 | International Conference on Business Information Systems   | K Shahzad; C Giannoulis                    | 2011 | Process output goals<br>Process output measures                                                                         |  | Summary redesign proposals<br>Impact analyses          |  |

|   |       |                                                                                                                                  |                                                                               |                                                    |      |                                                                                           |                                                                                       |                                                        |  |
|---|-------|----------------------------------------------------------------------------------------------------------------------------------|-------------------------------------------------------------------------------|----------------------------------------------------|------|-------------------------------------------------------------------------------------------|---------------------------------------------------------------------------------------|--------------------------------------------------------|--|
| 1 | BFT18 | Designing robust business processes                                                                                              | Organizing business knowledge: The MIT process handbook                       | M Klein; C Dellarocas                              | 2003 | Textual process description                                                               |                                                                                       | TO-BE exception handlers                               |  |
| 1 | BFT19 | Process grammar as a tool for business process design                                                                            | MIS Quarterly                                                                 | J Lee; GM Wyner; BT Pentland                       | 2008 | Textual process description                                                               |                                                                                       | Textual process descriptions                           |  |
| 1 | BFT20 | The PRICE Tool Kit: tool support for process improvement                                                                         | International Conference on Business Process Management                       | M Netjes; HA Reijers; WMP van der Aalst            | 2010 | Process model<br>Process measures                                                         |                                                                                       | Process models<br>Simulation models<br>Impact analyses |  |
| 1 | BFT21 | Development of a hybrid model to improve the efficiency of business process reengineering                                        | International Conference on Industrial Engineering and Engineering Management | W-H Tsai; C-C Yang; H-C Kuo                        | 2009 | Process output goals                                                                      |                                                                                       |                                                        |  |
| 1 | AC4   | Model-based support for business re-engineering                                                                                  | Information and Software Technology                                           | S Jarzabek; TW Ling                                | 1996 | Process output goals<br>Process model<br>Process output measures<br>Problem investigation | Process model<br>Simulation model<br>Process output measures<br>Problem investigation | Process models                                         |  |
| 2 | 176   | Empirically testing determinants of hospital BPR success                                                                         | International Journal of Health Care Quality Assurance                        | M Do Carmo Caccia-Bava; VCK Guimaraes; T Guimaraes | 2005 |                                                                                           | Problem investigation                                                                 |                                                        |  |
| 2 | 627   | An examination of the role of organizational enablers in business process reengineering and the impact of information technology | Information Resources Management Journal                                      | HR Ahadi                                           | 2004 |                                                                                           | Process output goals<br>Customer needs                                                |                                                        |  |

|   |      |                                                                                               |                                                                    |                                      |      |  |                                                                                                                      |  |                |
|---|------|-----------------------------------------------------------------------------------------------|--------------------------------------------------------------------|--------------------------------------|------|--|----------------------------------------------------------------------------------------------------------------------|--|----------------|
| 2 | 834  | Business process change and organizational performance: exploring an antecedent model         | Journal of Management Information Systems                          | S Guha; V Grover; WJ Kettinger et al | 1997 |  | Process output goals<br>Process model<br>Process output measures<br>Problem investigation<br>Technology developments |  |                |
| 2 | 836  | Empirically testing the antecedents of BPR success                                            | International Journal of Production Economics                      | T Guimaraes                          | 1997 |  | Process output goals<br>Process model<br>Problem investigation                                                       |  |                |
| 2 | 870  | Critical factors for the effectiveness of clinical pathway in improving care outcomes         | International Conference on Service Systems and Service Management | J Shi; Q Su; Z Zhao                  | 2008 |  |                                                                                                                      |  |                |
| 2 | 1286 | Critical success factors of TQM in service organizations: a proposed model                    | Services Marketing Quarterly                                       | F Talib; Z Rahman                    | 2010 |  | Customer needs<br>Process output measures<br>Benchmark process insights                                              |  |                |
| 2 | 1661 | The state of business process reengineering: a search for success factors                     | Total Quality Management & Business Excellence                     | D Paper; R-D Chang                   | 2005 |  | Process model                                                                                                        |  |                |
| 2 | 1672 | Breaking the rules: success and failure in groupware-supported business process reengineering | Decision Support Systems                                           | AR Dennis; TA Carte; GG Kelly        | 2003 |  | Process model<br>Problem investigation<br>Benchmark process insights                                                 |  | Process models |



|   |      |                                                                                                                       |                                                             |                                          |      |  |                                                                                            |  |                   |
|---|------|-----------------------------------------------------------------------------------------------------------------------|-------------------------------------------------------------|------------------------------------------|------|--|--------------------------------------------------------------------------------------------|--|-------------------|
| 2 | 2059 | Is there a future for pathways? Five pieces of the puzzle                                                             | International Journal of Care Pathways                      | K Vanhaecht; M Panella; R van Zelm et al | 2009 |  | Customer needs<br>Medical guidelines /<br>key interventions                                |  |                   |
| 2 | BFT3 | Collaborative business engineering: a decade of lessons from the field                                                | Journal of Management Information Systems                   | M Hengst; GJ de Vreede                   | 2004 |  | Process model<br>Simulation model<br>Problem investigation                                 |  | Simulation models |
| 2 | BFT7 | Prevalence and use of clinical pathways in 23 countries - an international survey by the European Pathway Association | International Journal of Care Pathways                      | K Vanhaecht; M Bollmann; K Bower et al   | 2006 |  | Customer needs<br>Medical guidelines                                                       |  |                   |
| 2 | AC2  | The implementation of business process reengineering                                                                  | Journal of Management Information Systems                   | V Grover; SR Jeong; WJ Kettinger et al   | 1995 |  | Process output goals<br>Customer needs<br>Problem investigation<br>Technology developments |  |                   |
| 2 | AC7  | Business process reengineering: application and success - an Australian study                                         | International Journal of Operations & Production Management | P O'Neill; AS Sohal                      | 1998 |  | Process output goals<br>Process model                                                      |  |                   |

**Table E.2:** Method element codings per study (Method.Input, Method.Output). P = Part.

| P | ID   | Title                                                                                                           | Source name                                                  | Authors                              | Year | Method.Technique<br>(developed method)                | Method.Technique<br>(reviewed method)          | Method.Tool<br>(developed method)                 | Method.Tool<br>(reviewed method) |
|---|------|-----------------------------------------------------------------------------------------------------------------|--------------------------------------------------------------|--------------------------------------|------|-------------------------------------------------------|------------------------------------------------|---------------------------------------------------|----------------------------------|
| 1 | 642  | Business process redesign in healthcare: towards a structured approach                                          | INFOR                                                        | MH Jansen-Vullers;<br>HA Reijers     | 2005 | Rule-based                                            | Unstructured<br>(unspecified)                  | Modeling<br>Simulation<br>Specific                |                                  |
| 1 | 664  | A TRIZ-based method for new service design                                                                      | Journal of Service Research                                  | K-H Chai; J Zhang;<br>K-C Tan        | 2005 | Rule-based                                            | Unstructured<br>(unspecified)<br>Brainstorming |                                                   |                                  |
| 1 | 865  | A consolidated methodology for business process reengineering                                                   | International Journal of Computer Applications in Technology | JYL Thong; C-S Yap; KL Seah          | 2003 | Brainstorming<br>Out-of-the-Box thinking<br>Visioning |                                                | Modeling<br>Simulation                            |                                  |
| 1 | 1073 | Visualized guidelines for IT-enabled process change                                                             | Information Resources Management Journal                     | MR Hoogeweegen                       | 2000 | Rule-based                                            | Unstructured<br>(unspecified)<br>Brainstorming |                                                   |                                  |
| 1 | 1076 | An intelligent tool for process redesign: manufacturing supply-chain applications                               | International Journal of Flexible Manufacturing Systems      | ME Nissen                            | 2000 | Rule-based                                            | Case-based                                     | Simulation<br>Specific                            |                                  |
| 1 | 1111 | New approaches to business process redesign: a case study of collaborative group technology and service mapping | Group Decision and Negotiation                               | GF Corbitt; M Christopolus; L Wright | 2000 | Nominal group                                         |                                                | Communication<br>Voting<br>Modeling<br>Repository |                                  |

|   |      |                                                                                 |                                                |                                         |      |                  |                                                                                  |                             |                                                   |
|---|------|---------------------------------------------------------------------------------|------------------------------------------------|-----------------------------------------|------|------------------|----------------------------------------------------------------------------------|-----------------------------|---------------------------------------------------|
| 1 | 1331 | Business process change: a study of methodologies, techniques, and tools        | MIS Quarterly                                  | WJ Kettinger; JTC Teng; S Guha          | 1997 |                  | Brainstorming<br>Out-of-the-Box thinking<br>Visioning<br>Delphi<br>Nominal group |                             | Communication<br>Voting<br>Modeling<br>Simulation |
| 1 | 1464 | Methodology-driven use of automated support in business process re-engineering  | Journal of Management Information Systems      | AR Dennis; RM Daniels Jr; G Hayes et al | 1994 | Nominal group    |                                                                                  | Communication<br>Repository |                                                   |
| 1 | 1616 | Applying Lean Six Sigma and TRIZ methodology in banking services                | Total Quality Management & Business Excellence | F-K Wang; K-S Chen                      | 2010 | Rule-based       | Brainstorming                                                                    |                             |                                                   |
| 1 | 1768 | ARMA: a multi-disciplinary approach to BPR                                      | Knowledge and Process Management               | M Glykas; G Valiris                     | 1999 |                  |                                                                                  |                             |                                                   |
| 1 | 1771 | Critical review of existing BPR methodologies: the need for a holistic approach | Business Process Management Journal            | G Valiris; M Glykas                     | 1999 |                  |                                                                                  |                             | Repository                                        |
| 1 | 1774 | Process reverse engineering for BPR: a form-based approach                      | Information & Management                       | K-H Kim; Y-G Kim                        | 1998 | Rule-based       |                                                                                  | Specific                    |                                                   |
| 1 | 1819 | Metrics-based process redesign with the MIT process handbook                    | Knowledge and Process Management               | A Margherita; M Klein; G Elia           | 2007 | Repository-based |                                                                                  | Repository                  |                                                   |

|   |      |                                                                                                 |                                                          |                                       |      |                    |                                                                        |                                         |  |
|---|------|-------------------------------------------------------------------------------------------------|----------------------------------------------------------|---------------------------------------|------|--------------------|------------------------------------------------------------------------|-----------------------------------------|--|
| 1 | 1973 | A structured evaluation of business process improvement approaches                              | Business Process Management Journal                      | G Zellner                             | 2011 |                    | Unstructured (unspecified)<br>Brainstorming                            |                                         |  |
| 1 | 1989 | A Service Experience Engineering (SEE) method for developing new services                       | International Journal of Management                      | S-L Hsiao; H-L Yang                   | 2010 | Multi-level design |                                                                        |                                         |  |
| 1 | 2085 | A handbook-based methodology for redesigning business processes                                 | Knowledge and Process Management                         | M Klein; C Petti                      | 2006 | Repository-based   | Brainstorming<br>Out-of-the-Box thinking<br>Visioning<br>Nominal group | Repository                              |  |
| 1 | 2089 | Service blueprinting: a practical technique for service innovation                              | California Management Review                             | MJ Bitner; AL Ostrom; FN Morgan       | 2008 | Brainstorming      |                                                                        |                                         |  |
| 1 | 2149 | Multilevel service design: From customer value constellation to service experience blueprinting | Journal of Service Research                              | L Patrício; RP Fisk; JF e Cunha et al | 2011 | Multi-level design |                                                                        |                                         |  |
| 1 | 2225 | Systematic improvement in service quality through TRIZ methodology: an exploratory study        | Total Quality Management & Business Excellence           | C-T Su; C-S Lin; T-L Chiang           | 2008 | Rule-based         | Unstructured (unspecified)<br>Brainstorming<br>Out-of-the-Box thinking |                                         |  |
| 1 | 2428 | PAWS: towards a participatory approach to business process reengineering                        | International Workshop on Groupware                      | MRS Borges; JA Pino                   | 1999 | Nominal group      |                                                                        | Communication<br>Modeling<br>Repository |  |
| 1 | 2530 | An innovative way to create new services: applying the TRIZ methodology                         | Journal of the Chinese Institute of Industrial Engineers | C-S Lin; C-T Su                       | 2007 | Rule-based         | Unstructured (unspecified)<br>Brainstorming<br>Out-of-the-Box thinking |                                         |  |

|   |      |                                                                                                                                 |                                                                                    |                                            |      |                  |                                                                               |                                          |  |
|---|------|---------------------------------------------------------------------------------------------------------------------------------|------------------------------------------------------------------------------------|--------------------------------------------|------|------------------|-------------------------------------------------------------------------------|------------------------------------------|--|
| 1 | 2560 | Enhancing business process redesign: using tools to condense the process                                                        | Hawaii International Conference on System Sciences                                 | G Corbitt; L Wright                        | 1997 | Nominal group    |                                                                               | Communication Voting Repository          |  |
| 1 | 3136 | Tools for inventing organizations: toward a handbook of organizational processes                                                | Management Science                                                                 | TW Malone; K Crowston; J Lee et al         | 1999 | Repository-based | Case-based                                                                    | Repository                               |  |
| 1 | 3137 | Tools for inventing organizations: toward a handbook of organizational processes                                                | Workshop on Enabling Technologies: Infrastructure for Collaborative Enterprises    | TW Malone; K Crowston; J Lee et al         | 1993 | Repository-based |                                                                               | Repository                               |  |
| 1 | 3200 | A groupware tool to support participatory business process reengineering                                                        | International Workshop on Groupware                                                | EZ Mouro; MRS Borges; CR Garcez            | 1999 | Nominal group    |                                                                               | Communication Voting Modeling Repository |  |
| 1 | 3227 | Intelligent tools for workflow process redesign: a research agenda                                                              | International Conference on Business Process Management                            | M Netjes; I Vanderfeesten; HA Reijers      | 2006 | Rule-based       | Unstructured (unspecified)<br>Grammar-based<br>Case-based<br>Repository-based |                                          |  |
| 1 | 3298 | Improving the effectiveness of business process development through collaboration engineering: a method for process elicitation | Hawaii International Conference on System Sciences                                 | K Piirainen; K Elfvengren; J Korpela et al | 2009 | Nominal group    |                                                                               | Communication Voting Repository          |  |
| 1 | 3408 | Process life cycle engineering: a knowledge-based approach and environment                                                      | International Journal of Intelligent Systems in Accounting, Finance and Management | W Scacchi; P Mi                            | 1997 | Rule-based       | Unstructured (unspecified)                                                    | Simulation                               |  |
| 1 | 3440 | A decision-based approach to business process improvement                                                                       | International Conference on Systems, Man and Cybernetics                           | K Shahzad; J Zdravkovic                    | 2010 | Rule-based       |                                                                               |                                          |  |

|   |       |                                                                                                               |                                                                  |                                        |      |                    |                                                           |                                                                 |  |
|---|-------|---------------------------------------------------------------------------------------------------------------|------------------------------------------------------------------|----------------------------------------|------|--------------------|-----------------------------------------------------------|-----------------------------------------------------------------|--|
| 1 | 3447  | Workflow reengineering: a methodology for business process reengineering using workflow management technology | Hawaii International Conference on System Sciences               | LTSM Bitzer; MN Kamel                  | 1997 | Rule-based         |                                                           | Modeling<br>Simulation                                          |  |
| 1 | 3469  | Service/product engineering as a potential approach to value enhancement in supply chains                     | Progress in Industrial Ecology - An International Journal        | A Simboli; A Raggi; L Petti et al.     | 2008 | Multi-level design |                                                           | Modeling<br>Repository                                          |  |
| 1 | BFT01 | Participatory business process reengineering design: generating solutions                                     | International Conference of the Chilean Computer Science Society | F Albano; JA Pino; MRS Borges          | 2001 | Nominal group      |                                                           | Communication<br>Voting<br>Modeling<br>Simulation<br>Repository |  |
| 1 | BFT02 | The process recombinator: a tool for generating new business process ideas                                    | International Conference on Information Systems                  | A Bernstein; M Klein; TW Malone        | 1999 | Repository-based   | Unstructured<br>(unspecified)<br>Brainstorming            | Repository                                                      |  |
| 1 | BFT03 | Analysis of techniques for business process improvement                                                       | European Conference on Information Systems                       | P Griesberger; S Leist; G Zellner      | 2011 |                    | Unstructured<br>(unspecified)<br>Brainstorming            |                                                                 |  |
| 1 | BFT04 | Selecting the best strategic practices for business process redesign                                          | Business Process Management Journal                              | P Hanafizadeh; M Moosakhani; J Bakhshi | 2009 | Rule-based         |                                                           |                                                                 |  |
| 1 | BFT06 | Grammatical approach to organizational design                                                                 | MIT Center for Coordination Science Technical Report             | J Lee; BT Pentland                     | 2000 | Grammar-based      | Brainstorming<br>Visioning<br>Nominal group<br>Rule-based |                                                                 |  |

|   |       |                                                                                                                       |                                                            |                                            |      |                                             |                                                                                                |            |  |
|---|-------|-----------------------------------------------------------------------------------------------------------------------|------------------------------------------------------------|--------------------------------------------|------|---------------------------------------------|------------------------------------------------------------------------------------------------|------------|--|
| 1 | BFT07 | Case-based reasoning as a technique for knowledge management in business process redesign                             | Electronic Journal on Knowledge Management                 | S Limam Mansar; F Marir; HA Reijers        | 2003 | Case-based                                  | Rule-based                                                                                     | Repository |  |
| 1 | BFT08 | Development of a decision-making strategy to improve the efficiency of BPR                                            | Expert Systems with Applications                           | S Limam Mansar; H A Reijers; F Ounnar      | 2009 | Rule-based                                  | Unstructured (unspecified)<br>Brainstorming<br>Grammar-based<br>Case-based<br>Repository-based | Specific   |  |
| 1 | BFT09 | On the formal generation of process redesigns                                                                         | International Conference on Business Process Management    | M Netjes; HA Reijers; WMP van der Aalst    | 2009 | Rule-based                                  |                                                                                                | Modeling   |  |
| 1 | BFT10 | Performing business process redesign with best practices: an evolutionary approach                                    | International Conference on Enterprise Information Systems | M Netjes; S Limam Mansar; HA Reijers et al | 2009 | Rule-based                                  |                                                                                                | Modeling   |  |
| 1 | BFT11 | Best practices in business process redesign: an overview and qualitative evaluation of successful redesign heuristics | Omega                                                      | HA Reijers; S Limam Mansar                 | 2005 | Rule-based                                  | Unstructured (unspecified)                                                                     |            |  |
| 1 | BFT12 | A tutorial on business process improvement                                                                            | Journal of Operations Management                           | TR Rohleder; EA Silver                     | 1997 | Unstructured (unspecified)<br>Brainstorming |                                                                                                |            |  |
| 1 | BFT13 | Towards a goal-driven approach for business process improvement using process-oriented data warehouse                 | International Conference on Business Information Systems   | K Shahzad; C Giannoulis                    | 2011 | Rule-based                                  |                                                                                                |            |  |

|   |       |                                                                                                                                  |                                                                               |                                                    |      |                  |                                                              |                                      |          |
|---|-------|----------------------------------------------------------------------------------------------------------------------------------|-------------------------------------------------------------------------------|----------------------------------------------------|------|------------------|--------------------------------------------------------------|--------------------------------------|----------|
| 1 | BFT18 | Designing robust business processes                                                                                              | Organizing business knowledge: The MIT process handbook                       | M Klein; C Dellarocas                              | 2003 | Repository-based | Unstructured (unspecified)                                   | Repository                           |          |
| 1 | BFT19 | Process grammar as a tool for business process design                                                                            | MIS Quarterly                                                                 | J Lee; GM Wyner; BT Pentland                       | 2008 | Grammar-based    | Unstructured (unspecified)<br>Rule-based<br>Repository-based | Repository                           |          |
| 1 | BFT20 | The PRICE Tool Kit: tool support for process improvement                                                                         | International Conference on Business Process Management                       | M Netjes; HA Reijers; WMP van der Aalst            | 2010 | Rule-based       | Unstructured (unspecified)                                   | Modeling<br>Simulation<br>Repository |          |
| 1 | BFT21 | Development of a hybrid model to improve the efficiency of business process reengineering                                        | International Conference on Industrial Engineering and Engineering Management | W-H Tsai; C-C Yang; H-C Kuo                        | 2009 | Rule-based       |                                                              |                                      |          |
| 1 | AC4   | Model-based support for business re-engineering                                                                                  | Information and Software Technology                                           | S Jarzabek; TW Ling                                | 1996 |                  |                                                              | Communication<br>Repository          | Modeling |
| 2 | 176   | Empirically testing determinants of hospital BPR success                                                                         | International Journal of Health Care Quality Assurance                        | M Do Carmo Caccia-Bava; VCK Guimaraes; T Guimaraes | 2005 |                  |                                                              |                                      |          |
| 2 | 627   | An examination of the role of organizational enablers in business process reengineering and the impact of information technology | Information Resources Management Journal                                      | HR Ahadi                                           | 2004 |                  |                                                              |                                      |          |



|   |      |                                                                                               |                                                                    |                                      |      |  |                                                                     |  |                                                   |
|---|------|-----------------------------------------------------------------------------------------------|--------------------------------------------------------------------|--------------------------------------|------|--|---------------------------------------------------------------------|--|---------------------------------------------------|
| 2 | 834  | Business process change and organizational performance: exploring an antecedent model         | Journal of Management Information Systems                          | S Guha; V Grover; WJ Kettinger et al | 1997 |  |                                                                     |  |                                                   |
| 2 | 836  | Empirically testing the antecedents of BPR success                                            | International Journal of Production Economics                      | T Guimaraes                          | 1997 |  |                                                                     |  |                                                   |
| 2 | 870  | Critical factors for the effectiveness of clinical pathway in improving care outcomes         | International Conference on Service Systems and Service Management | J Shi; Q Su; Z Zhao                  | 2008 |  |                                                                     |  |                                                   |
| 2 | 1286 | Critical success factors of TQM in service organizations: a proposed model                    | Services Marketing Quarterly                                       | F Talib; Z Rahman                    | 2010 |  |                                                                     |  |                                                   |
| 2 | 1661 | The state of business process reengineering: a search for success factors                     | Total Quality Management & Business Excellence                     | D Paper; R-D Chang                   | 2005 |  |                                                                     |  |                                                   |
| 2 | 1672 | Breaking the rules: success and failure in groupware-supported business process reengineering | Decision Support Systems                                           | AR Dennis; TA Carte; GG Kelly        | 2003 |  | Brainstorming<br>Out-of-the-Box thinking<br>Visioning<br>Rule-based |  | Communication<br>Voting<br>Modeling<br>Repository |

|   |      |                                                                                                                       |                                                             |                                          |      |  |  |  |                                              |
|---|------|-----------------------------------------------------------------------------------------------------------------------|-------------------------------------------------------------|------------------------------------------|------|--|--|--|----------------------------------------------|
| 2 | 2059 | Is there a future for pathways? Five pieces of the puzzle                                                             | International Journal of Care Pathways                      | K Vanhaecht; M Panella; R van Zelm et al | 2009 |  |  |  |                                              |
| 2 | BFT3 | Collaborative business engineering: a decade of lessons from the field                                                | Journal of Management Information Systems                   | M Hengst; GJ de Vreede                   | 2004 |  |  |  | Communication Modeling Simulation Repository |
| 2 | BFT7 | Prevalence and use of clinical pathways in 23 countries - an international survey by the European Pathway Association | International Journal of Care Pathways                      | K Vanhaecht; M Bollmann; K Bower et al   | 2006 |  |  |  |                                              |
| 2 | AC2  | The implementation of business process reengineering                                                                  | Journal of Management Information Systems                   | V Grover; SR Jeong; WJ Kettinger et al   | 1995 |  |  |  |                                              |
| 2 | AC7  | Business process reengineering: application and success - an Australian study                                         | International Journal of Operations & Production Management | P O'Neill; AS Sohal                      | 1998 |  |  |  |                                              |

**Table E.3:** Method element codings per study (Method.Technique, Method.Tool). P = Part.
